# Supplementary material
Source: PubMed Central journal article supplement (PMC4483154)
Supplement: NIHMS695417-supplement-Supporing_Information.pdf [file NIHMS695417-supplement-Supporing_Information.pdf]

**SUPPORTING INFORMATION**

**CHARMM Drude Polarizable Force Field for**

**Aldopentofuranoses and Methyl-**

**aldopentofuranosides**

*Madhurima Jana<sup>1,2</sup> and Alexander D. MacKerell, Jr.<sup>1,\*</sup>*

<sup>1</sup>Department of Pharmaceutical Sciences, University of Maryland, 20 Penn Street HSF II,  
Baltimore, Maryland 21201, USA

<sup>2</sup>Department of Chemistry, National Institute of Technology Rourkela, Rourkela 769008,  
Odisha, India

\* Corresponding author. E-mail: (A.D.M.) alex@outerbanks.umaryland.edu.

**Table S1:** Upper and lower bounds used for the optimization of the electrostatic parameters in the aldopentoses.

| Atoms   | Charges |        | Alpha     |             | Thole   |         |
|---------|---------|--------|-----------|-------------|---------|---------|
|         | Upper   | Lower  | Upper     | Lower       | Upper   | Lower   |
| C1      | 0.173   | 0.073  | -1.0      | -2.10       | 2.4     | 0.3     |
| O1      | -0.15   | -0.25  | -0.5      | -1.3        | 2.4     | 0.3     |
| HO1     | 0.37    | 0.27   | --        | --          | --      | --      |
| C4      | 0.142   | 0.042  | -1.0      | -2.10       | 2.4     | 0.3     |
| O4      | -0.087  | -0.187 | -0.5      | -1.3        | 2.4     | 0.3     |
| C5      | -0.01   | -0.11  | -1.0      | -2.10       | 2.4     | 0.3     |
| O5      | -0.18   | -0.28  | -0.5      | -1.3        | 2.4     | 0.3     |
| HO5     | 0.41    | 0.31   | --        | --          | --      | --      |
| C2/C3   | 0.06    | -0.04  | -1.0/-1.0 | -2.10/-2.10 | 2.4/2.4 | 0.3/0.3 |
| O2/O3   | -0.15   | -0.25  | -0.5/-0.5 | -1.3/-1.3   | 2.4/2.4 | 0.3/0.3 |
| HO2/HO3 | 0.37    | 0.27   | --        | --          | --      | --      |

**Table S2.** QM, Drude (Globalfit parameters) and Additive ARIB–Water Minimum Interaction Energies (kcal/mol).

| Arib               | Type | $E_{QM}$ | $E_{MM}$ (Drude) | $\Delta E$ (Drude MM-QM) | $E_{MM}$ (Add) | $\Delta E$ (Add MM-QM) |
|--------------------|------|----------|------------------|--------------------------|----------------|------------------------|
| HO1                | D    | -6.29    | -5.14            | 1.15                     | -6.93          | -0.64                  |
| HO2                | D    | -0.38    | -0.37            | 0.01                     | 0.81           | 1.19                   |
| HO5                | D    | -5.96    | -5.69            | 0.27                     | -7.37          | -1.41                  |
| H5                 | D    | -1.53    | -0.81            | 0.72                     | -1.07          | 0.46                   |
| H5                 | D    | -1.32    | -1.22            | 0.10                     | -1.39          | 0.08                   |
| O4                 | LP   | -5.60    | -5.66            | -0.06                    | -5.14          | 0.46                   |
| O4                 | BIS  | -4.65    | -4.14            | 0.51                     | -3.81          | 0.84                   |
| O1                 | LP   | -2.30    | -3.09            | -0.79                    | -3.54          | -1.25                  |
| O2                 | LP   | -4.88    | -6.24            | -1.36                    | -6.41          | -1.54                  |
| O2                 | BIS  | -4.34    | -6.23            | -1.89                    | -5.99          | -1.65                  |
| O3                 | BIS  | -5.96    | -6.07            | -0.11                    | -6.81          | -0.85                  |
| O5                 | LP   | -4.86    | -5.11            | -0.25                    | -5.55          | -0.69                  |
| O5                 | BIS  | -4.81    | -5.14            | -0.33                    | -5.94          | -1.13                  |
| Average difference |      |          | -0.16            |                          | -0.48          |                        |

D represents the donor sites, BIS and LP represents Acceptor sites

**Table S3.** QM, Drude (Globalfit parameters) and Additive ARIB–Water Minimum Distances (Å).

| Arib               | Type | $R_{QM}$ | $R_{MM}$ (Drude) | $\Delta R$ (Drude MM-QM) | $R_{MM}$ (Add) | $\Delta R$ (Add MM-QM) |
|--------------------|------|----------|------------------|--------------------------|----------------|------------------------|
| HO1                | D    | 1.85     | 1.87             | 0.02                     | 1.82           | -0.03                  |
| HO2                | D    | 3.62     | 2.70             | -0.92                    | 4.50           | 0.88                   |
| HO5                | D    | 1.89     | 1.88             | -0.01                    | 1.82           | -0.07                  |
| H5                 | D    | 2.41     | 2.79             | 0.38                     | 2.84           | 0.33                   |
| H5                 | D    | 2.44     | 2.72             | 0.28                     | 2.68           | 0.24                   |
| O4                 | LP   | 1.89     | 1.79             | -0.10                    | 1.73           | -0.16                  |
| O4                 | BIS  | 1.95     | 1.88             | -0.07                    | 1.77           | -0.18                  |
| O1                 | LP   | 3.93     | 4.02             | -0.09                    | 4.11           | 0.08                   |
| O2                 | LP   | 1.96     | 1.79             | -0.17                    | 1.88           | -0.08                  |
| O2                 | BIS  | 1.99     | 1.76             | -0.23                    | 1.87           | -0.12                  |
| O3                 | BIS  | 1.90     | 1.81             | -0.09                    | 1.88           | -0.02                  |
| O5                 | LP   | 1.96     | 1.83             | -0.13                    | 1.88           | -0.08                  |
| O5                 | BIS  | 1.97     | 1.86             | -0.11                    | 1.87           | -0.10                  |
| Average difference |      |          | -0.09            |                          | 0.05           |                        |

D represents the donor sites, BIS and LP represents Acceptor sites

**Table S4.** QM, Drude (Globalfit parameters) and Additive BRIB–Water Minimum Interaction Energies (kcal/mol).

| Brib               | Type | $E_{QM}$ | $E_{MM}$ (Drude) | $\Delta E$ (Drude MM-QM) | $E_{MM}$ (Add) | $\Delta E$ (Add MM-QM) |
|--------------------|------|----------|------------------|--------------------------|----------------|------------------------|
| HO1                | D    | -5.26    | -4.78            | 0.48                     | -6.66          | -1.40                  |
| HO3                | D    | -0.02    | -0.44            | -0.42                    | 0.07           | 0.09                   |
| HO5                | D    | -6.68    | -6.00            | 0.68                     | -8.28          | -1.60                  |
| H5                 | D    | -1.74    | -1.11            | 0.63                     | -1.33          | 0.41                   |
| H5                 | D    | -1.97    | -1.61            | 0.36                     | -1.99          | -0.02                  |
| O4                 | LP   | -5.39    | -6.10            | -0.71                    | -4.82          | 0.57                   |
| O4                 | BIS  | -5.35    | -4.82            | 0.53                     | -5.05          | 0.30                   |
| O1                 | LP   | -4.17    | -4.38            | -0.21                    | -4.23          | -0.07                  |
| O1                 | BIS  | -4.58    | -5.09            | -0.51                    | -4.96          | -0.38                  |
| O2                 | LP   | -4.89    | -5.66            | -0.77                    | -5.27          | -0.38                  |
| O2                 | BIS  | -5.17    | -6.06            | -0.89                    | -6.04          | -0.87                  |
| O3                 | BIS  | -4.31    | -4.97            | -0.66                    | -4.68          | -0.37                  |
| O5                 | LP   | -4.15    | -4.30            | -0.15                    | -4.84          | -0.69                  |
| O5                 | BIS  | -3.79    | -4.44            | -0.65                    | -4.86          | -1.07                  |
| Average difference |      |          | -0.16            |                          | -0.39          |                        |

D represents the donor sites, BIS and LP represents Acceptor sites

**Table S5.** QM, Drude (Globalfit parameters) and Additive BRIB–Water Minimum Distances (Å).

| Brib               | Type | $R_{QM}$ | $R_{MM}$ (Drude) | $\Delta R$ (Drude MM-QM) | $R_{MM}$ (Add) | $\Delta R$ (Add MM-QM) |
|--------------------|------|----------|------------------|--------------------------|----------------|------------------------|
| HO1                | D    | 1.88     | 1.87             | 0.01                     | 1.82           | -0.06                  |
| HO2                | D    | 4.35     | 4.49             | 0.14                     | 4.49           | 0.14                   |
| HO5                | D    | 1.87     | 1.87             | 0.00                     | 1.82           | -0.05                  |
| H5                 | D    | 2.29     | 2.71             | 0.42                     | 2.67           | 0.38                   |
| H5                 | D    | 2.37     | 2.68             | 0.31                     | 2.64           | 0.27                   |
| O4                 | LP   | 1.90     | 1.82             | 0.08                     | 1.78           | -0.12                  |
| O4                 | BIS  | 1.93     | 1.84             | 0.09                     | 1.74           | -0.19                  |
| O1                 | LP   | 1.98     | 1.82             | -0.16                    | 1.91           | -0.07                  |
| O1                 | BIS  | 1.95     | 1.82             | -0.13                    | 1.89           | -0.06                  |
| O2                 | LP   | 1.95     | 1.78             | -0.17                    | 1.89           | -0.06                  |
| O2                 | BIS  | 1.94     | 1.79             | -0.15                    | 1.87           | -0.07                  |
| O3                 | BIS  | 1.97     | 1.80             | -0.17                    | 1.90           | -0.07                  |
| O5                 | LP   | 1.98     | 1.86             | -0.12                    | 1.90           | -0.08                  |
| O5                 | BIS  | 1.96     | 1.83             | -0.13                    | 1.86           | -0.10                  |
| Average difference |      |          | 0.00             |                          | -0.01          |                        |

D represents the donor sites, BIS and LP represents Acceptor sites

**Table S6:** Furanose conformations used to fit QM energies at the RIMP2/cc-pVQZ//MP2/6-31G(d) level for different dihedral types. The subscripts R, E and H indicate ring, exocyclic and hydroxyl atoms, respectively.

| Compounds | No. of conformations | Type of dihedrals                                                                                |
|-----------|----------------------|--------------------------------------------------------------------------------------------------|
| aarb      | 263                  | $C_{R/E}-C_R-C_R-O_H$ , $C_R-C_R-C_R-O_R$                                                        |
| barb      | 279                  | $C_R-C_R-O_H-H$ , $C_R-C_E-O_H-H$                                                                |
| arib      | 276                  | $C_R-O_R-C_R-C_{R/E}$ , $C_R-O_R-C_R-O_H$                                                        |
| brib      | 278                  | $O_R-C_R-C_R-O_H$ , $C_R-C_R-C_R-C_R$<br>$O_H-C_R-C_R-O_H$ , $O_R-C_R-O_H-H$ , $C_R-C_R-C_E-O_H$ |

**Table S6b.** List of specific targeted dihedrals for the aldopentofuranoses

| Type of dihedral      | Specific dihedral                                        |
|-----------------------|----------------------------------------------------------|
| $C_R-C_R-C_R-C_R$     | C1C2C3C4                                                 |
| $C_R-C_R-C_R-O_R$     | C2C3C4O4, C3C2C1O4,                                      |
| $C_{R/E}-C_R-C_R-O_H$ | C3C2C1O1, C4C3C2O2, C5C4C3O3, C1C2C3O3                   |
| $C_R-C_R-O_H-H$       | C1C2O2HO2, C2C3O3HO3, C3C2O2HO2,<br>C4C3O3HO3, C2C1O1HO1 |
| $C_R-C_E-O_H-H$       | C4C5O5HO5                                                |
| $C_R-O_R-C_R-C_{R/E}$ | C1O4C4C3, C4O4C1C2, C4O4C1O1, C1O4C4C5                   |
| $C_R-O_R-C_R-O_H$     | C4O4C1O1                                                 |
| $O_R-C_R-C_R-O_H$     | O2C2C1O4, O3C3C4O4                                       |
| $O_H-C_R-C_R-O_H$     | O2C2C3O3, O1C1C2O2                                       |
| $O_R-C_R-O_H-H$       | O4C1O1HO1                                                |
| $C_R-C_R-C_E-O_H$     | C3C4C5O5                                                 |

**Figure S1.** Convergence of the RMSD between MM and QM total dipole moments for methyl-furanosides using the MCSA approach.

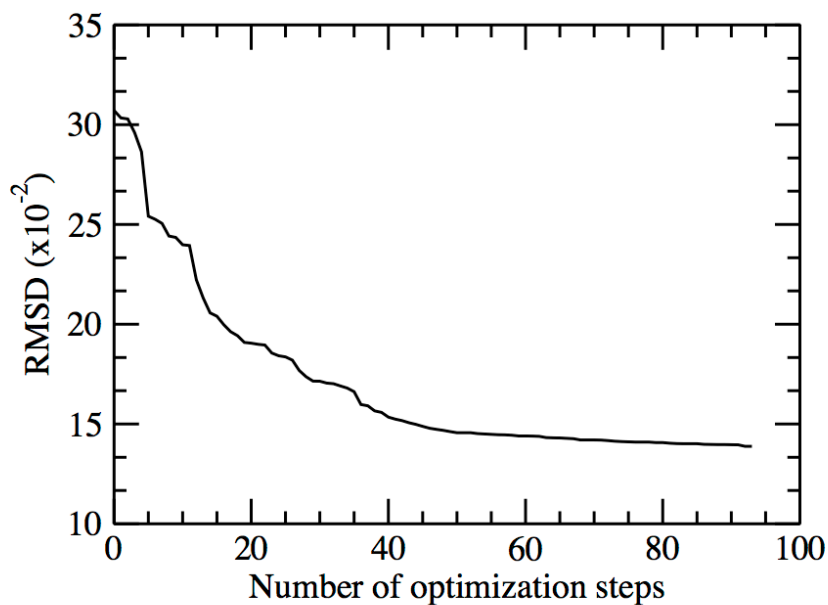

**Figure S2.** Relative QM (red) and Drude MM energies before (green) and after (blue) dihedral fit for conformations of  $\alpha$ -methyl-arabinofuranoside,  $\beta$ -methyl-arabinofuranoside,  $\alpha$ -methyl-lyxofuranoside.

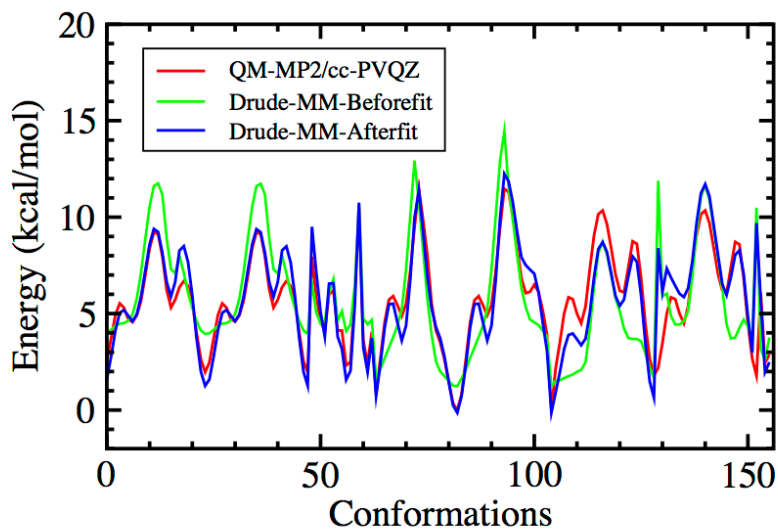

**Figure S3.** Interaction geometries of methyl- $\alpha$ -D-arabinofuranoside-water (left) and methyl- $\beta$ -D-arabinofuranoside-water (right) interactions.

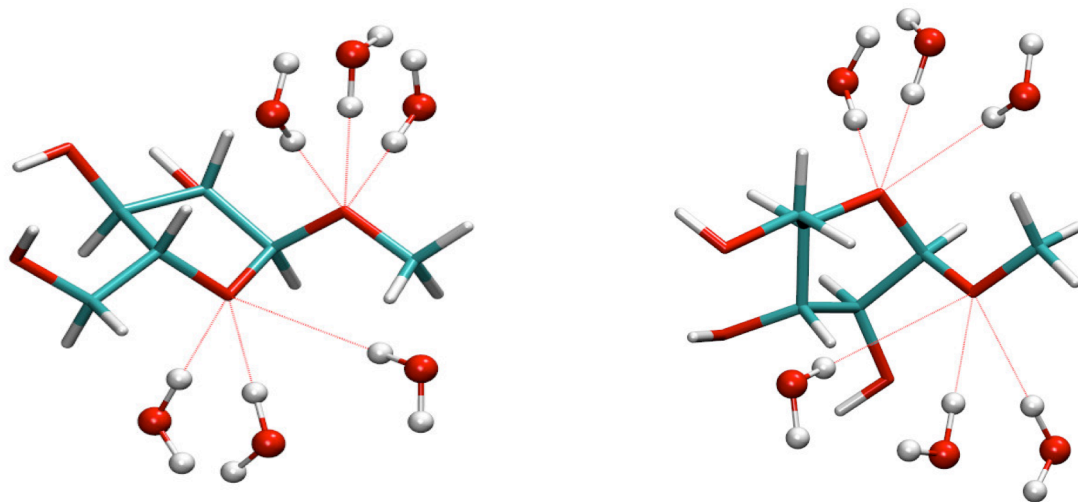

**Table S7.** Summary of the OME-AARB-water and OME-BARB-water interaction energies (kcal/mol) for the Drude FF and the CHARMM additive FF.

| Compds  | Energy             | Drude | Additive |
|---------|--------------------|-------|----------|
| Me-aarb | Avg difference     | 0.278 | 0.553    |
|         | RMSD               | 0.486 | 0.746    |
|         | Avg abs difference | 0.405 | 0.592    |
| Me-barb | Avg difference     | -0.09 | 0.09     |
|         | RMSD               | 0.499 | 0.764    |
|         | Avg abs difference | 0.412 | 0.672    |



**Table S8.** Differences in average internal geometries of methyl-aldopentofuranoses as calculated from simulations of infinite crystals and experimental crystal data.

| Compounds        | methyl- $\alpha$ -arabinofuranoside | methyl- $\beta$ -arabinofuranoside | methyl- $\alpha$ -xylofuranoside | methyl- $\alpha$ -lyxofuranoside | Average |
|------------------|-------------------------------------|------------------------------------|----------------------------------|----------------------------------|---------|
| <b>Bonds</b>     |                                     |                                    |                                  |                                  |         |
| O4-C1            | 0.01                                | 0.03                               | 0.02                             | 0.01                             | 0.02    |
| C1-C2            | 0.00                                | -0.01                              | 0.00                             | 0.00                             | 0.00    |
| C2-C3            | 0.00                                | -0.01                              | 0.00                             | 0.00                             | 0.00    |
| C3-C4            | -0.01                               | -0.01                              | 0.00                             | 0.01                             | 0.00    |
| O1-CM            | -0.02                               | -0.01                              | -0.01                            | -0.02                            | -0.01   |
| C2-O2            | 0.02                                | 0.04                               | 0.03                             | 0.03                             | 0.03    |
| C3-O3            | 0.02                                | 0.03                               | 0.02                             | 0.03                             | 0.03    |
| C4-C5            | 0.01                                | 0.01                               | 0.01                             | 0.02                             | 0.01    |
| C5-O5            | 0.00                                | 0.01                               | 0.01                             | -0.01                            | 0.00    |
| C4-O4            | -0.01                               | 0.02                               | -0.02                            | -0.02                            | -0.02   |
| C1-O1            | 0.03                                | 0.03                               | 0.03                             | 0.04                             | 0.03    |
| Average diff.    | 0.01                                | 0.01                               | 0.01                             | 0.01                             | 0.01    |
| <b>Angles</b>    |                                     |                                    |                                  |                                  |         |
| O4-C1-C2         | -1.64                               | -1.27                              | -0.08                            | 0.10                             | -0.77   |
| C2-C1-O1         | 1.38                                | 2.77                               | 2.20                             | 0.37                             | 1.68    |
| C1-C2-C3         | 0.10                                | -0.15                              | 0.31                             | -0.57                            | -0.08   |
| C2-C3-C4         | -0.86                               | -1.10                              | -0.45                            | -0.02                            | -0.61   |
| O4-C4-C5         | -0.37                               | -4.35                              | 0.14                             | -0.94                            | -1.38   |
| C1-O1-CM         | -1.96                               | -1.41                              | -1.47                            | -2.43                            | -1.82   |
| C3-C2-O2         | -4.86                               | -1.24                              | -2.17                            | 0.06                             | -2.05   |
| C4-C3-O3         | -2.53                               | 0.04                               | 1.16                             | 3.26                             | 0.48    |
| C4-C5-O5         | 1.02                                | -1.30                              | 1.19                             | 0.26                             | 0.30    |
| C3-C4-O4         | -1.58                               | 0.34                               | 1.15                             | -0.60                            | -0.17   |
| C4-O4-C1         | 0.27                                | 0.48                               | -0.35                            | -0.21                            | 0.05    |
| O4-C1-O1         | -1.28                               | -0.19                              | -0.72                            | 0.08                             | -0.53   |
| Average diff.    | -1.03                               | -0.62                              | 0.08                             | -0.05                            | -0.41   |
| <b>Dihedrals</b> |                                     |                                    |                                  |                                  |         |
| C4-O4-C1-C2      | -1.35                               | -3.47                              | 1.55                             | -2.83                            | -1.53   |
| O4-C1-C2-C3      | -1.56                               | -1.14                              | -1.41                            | 1.66                             | -0.61   |
| C1-C2-C3-C4      | 3.39                                | 5.46                               | 0.79                             | -0.29                            | 2.34    |
| C2-C3-C4-O4      | -3.98                               | -7.05                              | 0.13                             | -1.71                            | -3.15   |
| C3-C4-O4-C1      | 3.65                                | 6.53                               | -1.07                            | 2.60                             | 2.93    |
| C2-C1-O1-CM      | 12.16                               | -5.92                              | 6.43                             | 4.11                             | 4.19    |
| C3-C2-O2-HO2     | -2.88                               | -4.67                              | 4.30                             | -3.70                            | -1.74   |
| C4-C3-O3-HO3     | -9.46                               | -3.15                              | 4.79                             | 4.36                             | -0.87   |
| O4-C4-C5-O5      | 4.02                                | 1.06                               | -0.43                            | 3.35                             | 2.00    |
| C4-C5-O5-HO5     | -3.64                               | 1.05                               | -9.77                            | 11.18                            | -0.30   |
| C1-O4-C4-C5      | -0.37                               | 2.03                               | -0.24                            | -1.75                            | -0.08   |
| Average diff.    | 0.00                                | 0.84                               | 0.46                             | 1.54                             | 0.29    |

**Figure S4.** Time evolution plot of pseudorotation angle for aarb, arib, axyf, alyf (left panel, top to bottom) and barb, brib, bxyf, blyf (right panel, top to bottom).

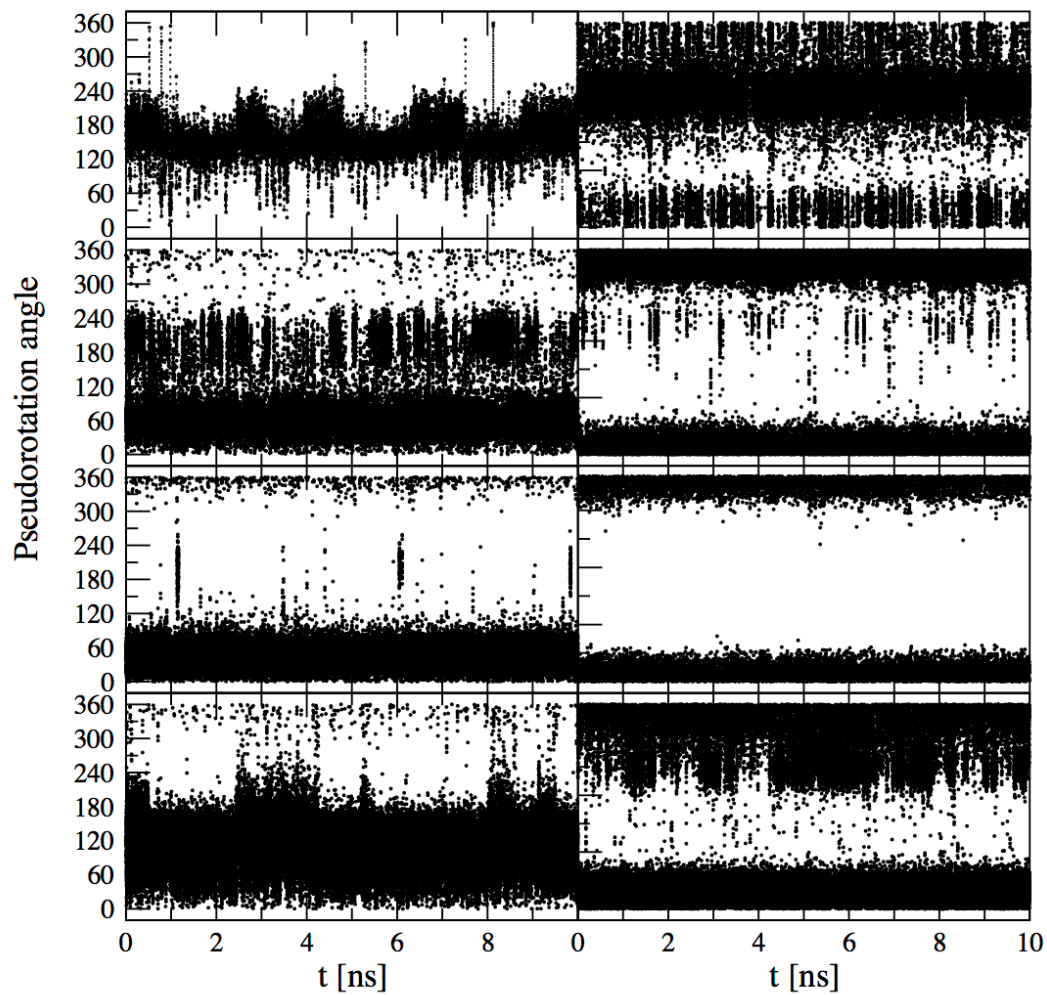

**Figure S5.** Distribution of pseudorotation angle for aarb, arib, axyf, alyf (a,c,e,g at left panel) and barb, brib, bxyf, blyf (b,d,f,h at right panel).

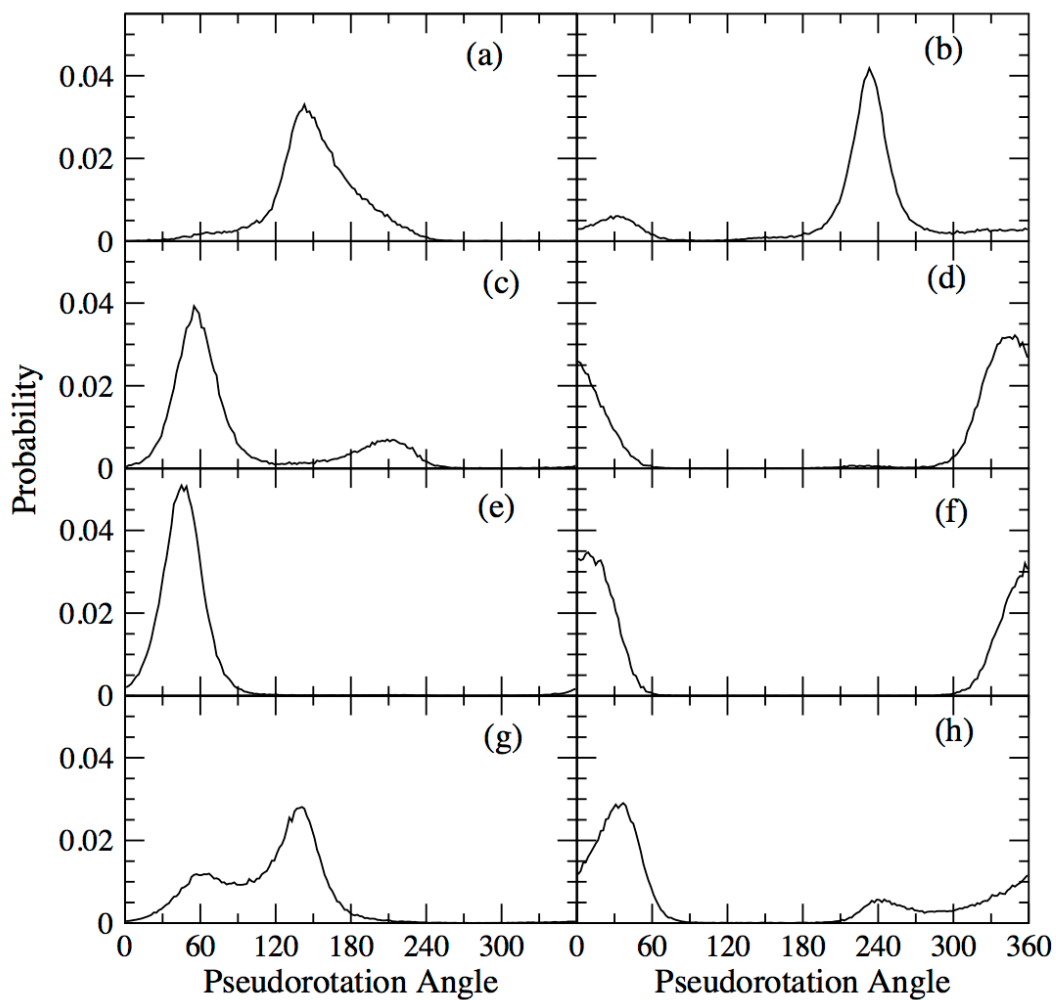

**Table S9.** Classical Drude oscillator based polarizable force field for furanose monosaccharides

```

* DRUDE topology and parameter stream file
* Furanoses,
*
read rtf card append
* Drude Furanoses
*
38

!furanoses, rima
RESI ARIB          0.000 ! alpha-Ribose
!RING * 5 C1 C2 C3 C4 O4
!
!           HO5--O5
!           \      /
!           H51--C5 / O4 \ H1
!           / \ / \ \ /
!           H52  C4  C1
!           / \ \ / \
!           H4   \ /  O1--HO1
!           C3----C2
!           / \ / \
!           HO3--O3 H3 O2 H2
!           |
!           HO2
GROUP
ATOM O4   OD305A   0.000  ALPHA -0.684 THOLE 2.074
ATOM C1   CD31FA   0.124  ALPHA -1.022 THOLE 0.462
ATOM H1   HDA1A    0.070
ATOM O1   OD31E    0.000  ALPHA -1.176 THOLE 1.559
ATOM HO1  HDP1A    0.333
ATOM C4   CD31FC   0.112  ALPHA -1.014 THOLE 0.820
ATOM H4   HDA2E    0.069
ATOM LP1A LPD      -0.202
ATOM LP1B LPD      -0.202
ATOM LP4A LPD      -0.152
ATOM LP4B LPD      -0.152
ATOM LPX4 LPD      0.000 !dummy for anisotropic polarizability
GROUP ! taken from ETOH
ATOM C5   CD32A   -0.086  ALPHA -1.805 THOLE 0.353
ATOM H51  HDA2A    0.080
ATOM H52  HDA2A    0.080
ATOM O5   OD31A    0.000  ALPHA -0.732 THOLE 1.027
ATOM HO5  HDP1A    0.328
ATOM LP5A LPD      -0.201
ATOM LP5B LPD      -0.201
GROUP ! taken from glycerol
ATOM C2   CD31FB  -0.006  ALPHA -1.438 THOLE 1.015
ATOM H2   HDA1A    0.070
ATOM O2   OD31E    0.000  ALPHA -0.940 THOLE 0.670
ATOM HO2  HDP1A    0.322
ATOM LP2A LPD      -0.193

```

ATOM LP2B LPD -0.193  
 GROUP ! taken from glycerol  
 ATOM C3 CD31FB -0.006 ALPHA -1.127 THOLE 1.340  
 ATOM H3 HDA1A 0.070  
 ATOM O3 OD31E 0.000 ALPHA -0.881 THOLE 0.328  
 ATOM HO3 HDP1A 0.322  
 ATOM LP3A LPD -0.193  
 ATOM LP3B LPD -0.193

!  
 BOND O4 C1 C1 H1 C1 O1 O1 HO1  
 BOND C1 C2 C2 H2 C2 O2 O2 HO2  
 BOND C2 C3 C3 H3 C3 O3 O3 HO3  
 BOND C3 C4 C4 H4 C4 C5 C4 O4  
 BOND C5 H51 C5 H52 C5 O5 O5 HO5  
 BOND O1 LP1A O1 LP1B  
 BOND O2 LP2A O2 LP2B  
 BOND O3 LP3A O3 LP3B  
 BOND O4 LP4A O4 LP4B O4 LPX4  
 BOND O5 LP5A O5 LP5B

LONEPAIR relative LP1A O1 C1 HO1 distance 0.35 angle 110.0 dihe 91.0  
 LONEPAIR relative LP1B O1 C1 HO1 distance 0.35 angle 110.0 dihe 269.0  
 ANISOTROPY O1 C1 LP1A LP1B A11 0.8108 A22 1.2162

LONEPAIR relative LP2A O2 C2 HO2 distance 0.35 angle 110.0 dihe 91.0  
 LONEPAIR relative LP2B O2 C2 HO2 distance 0.35 angle 110.0 dihe 269.0  
 ANISOTROPY O2 C2 LP2A LP2B A11 0.8108 A22 1.2162

LONEPAIR relative LP3A O3 C3 HO3 distance 0.35 angle 110.0 dihe 91.0  
 LONEPAIR relative LP3B O3 C3 HO3 distance 0.35 angle 110.0 dihe 269.0  
 ANISOTROPY O3 C3 LP3A LP3B A11 0.8108 A22 1.2162

LONEPAIR bisector LP4A O4 C1 C4 distance 0.35 angle 110.0 dihe 90.0  
 LONEPAIR bisector LP4B O4 C1 C4 distance 0.35 angle 110.0 dihe 270.0  
 LONEPAIR bisector LPX4 O4 C1 C4 distance 0.10 angle 0.0 dihe 0.0  
 ANISOTROPY O4 LPX4 LP4A LP4B A11 0.8889 A22 1.2222

LONEPAIR relative LP5A O5 C5 HO5 distance 0.35 angle 110.0 dihe 91.0  
 LONEPAIR relative LP5B O5 C5 HO5 distance 0.35 angle 110.0 dihe 269.0  
 ANISOTROPY O5 C5 LP5A LP5B A11 0.8108 A22 1.2162

! IC table; from minimized geometry\*

|    |    |    |     |     |        |        |         |        |        |
|----|----|----|-----|-----|--------|--------|---------|--------|--------|
| IC | C4 | O4 | C1  | C2  | 1.4343 | 107.06 | -43.51  | 102.91 | 1.5564 |
| IC | O4 | C1 | C2  | C3  | 1.4227 | 102.91 | 29.68   | 103.27 | 1.5615 |
| IC | C1 | C2 | C3  | C4  | 1.5564 | 103.27 | -6.90   | 103.97 | 1.5386 |
| IC | C3 | O4 | *C4 | C5  | 1.5386 | 104.85 | 125.17  | 112.30 | 1.5446 |
| IC | C3 | O4 | *C4 | H4  | 1.5386 | 104.85 | -116.42 | 106.12 | 1.1143 |
| IC | O4 | C4 | C5  | O5  | 1.4343 | 112.30 | -178.59 | 110.88 | 1.4293 |
| IC | C4 | C5 | O5  | HO5 | 1.5446 | 110.88 | -86.85  | 110.49 | 0.9639 |
| IC | O5 | C4 | *C5 | H51 | 1.4293 | 110.88 | 119.78  | 108.95 | 1.1027 |
| IC | O5 | C4 | *C5 | H52 | 1.4293 | 110.88 | -122.02 | 109.96 | 1.1020 |
| IC | C2 | O4 | *C1 | O1  | 1.5564 | 102.91 | 122.54  | 109.76 | 1.4025 |
| IC | O4 | C1 | O1  | HO1 | 1.4227 | 109.76 | 66.79   | 107.33 | 0.9584 |

|       |    |     |     |        |        |         |        |        |
|-------|----|-----|-----|--------|--------|---------|--------|--------|
| IC C2 | O4 | *C1 | H1  | 1.5564 | 102.91 | -117.68 | 108.69 | 1.1117 |
| IC C3 | C1 | *C2 | H2  | 1.5615 | 103.27 | -113.35 | 106.87 | 1.1124 |
| IC C3 | C1 | *C2 | O2  | 1.5615 | 103.27 | 127.46  | 116.16 | 1.4278 |
| IC C1 | C2 | O2  | HO2 | 1.5564 | 116.16 | -81.77  | 106.00 | 0.9665 |
| IC C2 | C4 | *C3 | O3  | 1.5615 | 103.97 | -125.04 | 111.07 | 1.4263 |
| IC C2 | C4 | *C3 | H3  | 1.5615 | 103.97 | 115.28  | 109.94 | 1.1126 |
| IC C4 | C3 | O3  | HO3 | 1.5386 | 111.07 | -77.15  | 108.40 | 0.9644 |
| IC C2 | C4 | *C3 | H4  | 1.5615 | 103.97 | -95.69  | 28.61  | 2.1867 |

RESI BRIB 0.000 ! beta-Ribose

!RING \* 5 C1 C2 C3 C4 O4

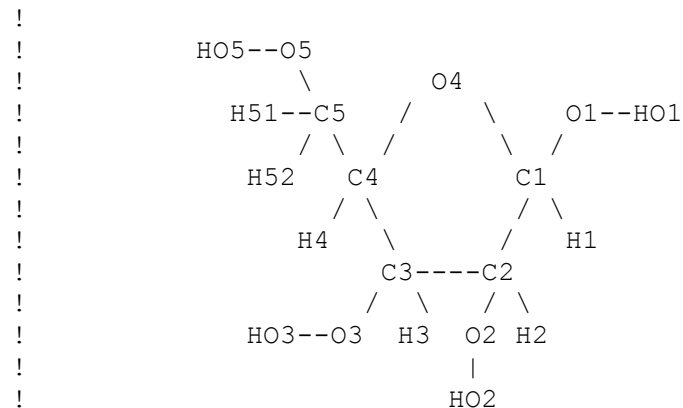

GROUP

|           |        |        |                                       |        |       |       |
|-----------|--------|--------|---------------------------------------|--------|-------|-------|
| ATOM O4   | OD305A | 0.000  | ALPHA                                 | -0.684 | THOLE | 2.074 |
| ATOM C1   | CD31FA | 0.124  | ALPHA                                 | -1.022 | THOLE | 0.462 |
| ATOM H1   | HDA1A  | 0.070  |                                       |        |       |       |
| ATOM O1   | OD31E  | 0.000  | ALPHA                                 | -1.176 | THOLE | 1.559 |
| ATOM HO1  | HDP1A  | 0.333  |                                       |        |       |       |
| ATOM C4   | CD31FC | 0.112  | ALPHA                                 | -1.014 | THOLE | 0.820 |
| ATOM H4   | HDA2E  | 0.069  |                                       |        |       |       |
| ATOM LP1A | LPD    | -0.202 |                                       |        |       |       |
| ATOM LP1B | LPD    | -0.202 |                                       |        |       |       |
| ATOM LP4A | LPD    | -0.152 |                                       |        |       |       |
| ATOM LP4B | LPD    | -0.152 |                                       |        |       |       |
| ATOM LPX4 | LPD    | 0.000  | !dummy for anisotropic polarizability |        |       |       |

GROUP ! taken from ETOH

|           |       |        |       |        |       |       |
|-----------|-------|--------|-------|--------|-------|-------|
| ATOM C5   | CD32A | -0.086 | ALPHA | -1.805 | THOLE | 0.353 |
| ATOM H51  | HDA2A | 0.080  |       |        |       |       |
| ATOM H52  | HDA2A | 0.080  |       |        |       |       |
| ATOM O5   | OD31A | 0.000  | ALPHA | -0.732 | THOLE | 1.027 |
| ATOM HO5  | HDP1A | 0.328  |       |        |       |       |
| ATOM LP5A | LPD   | -0.201 |       |        |       |       |
| ATOM LP5B | LPD   | -0.201 |       |        |       |       |

GROUP ! taken from glycerol

|           |        |        |       |        |       |       |
|-----------|--------|--------|-------|--------|-------|-------|
| ATOM C2   | CD31FB | -0.006 | ALPHA | -1.438 | THOLE | 1.015 |
| ATOM H2   | HDA1A  | 0.070  |       |        |       |       |
| ATOM O2   | OD31E  | 0.000  | ALPHA | -0.940 | THOLE | 0.670 |
| ATOM HO2  | HDP1A  | 0.322  |       |        |       |       |
| ATOM LP2A | LPD    | -0.193 |       |        |       |       |
| ATOM LP2B | LPD    | -0.193 |       |        |       |       |

GROUP ! taken from glycerol

|         |        |        |       |        |       |       |
|---------|--------|--------|-------|--------|-------|-------|
| ATOM C3 | CD31FB | -0.006 | ALPHA | -1.127 | THOLE | 1.340 |
|---------|--------|--------|-------|--------|-------|-------|

ATOM H3 HDA1A 0.070  
 ATOM O3 OD31E 0.000 ALPHA -0.881 THOLE 0.328  
 ATOM HO3 HDP1A 0.322  
 ATOM LP3A LPD -0.193  
 ATOM LP3B LPD -0.193

!  
 BOND O4 C1 C1 H1 C1 O1 O1 HO1  
 BOND C1 C2 C2 H2 C2 O2 O2 HO2  
 BOND C2 C3 C3 H3 C3 O3 O3 HO3  
 BOND C3 C4 C4 H4 C4 C5 C4 O4  
 BOND C5 H51 C5 H52 C5 O5 O5 HO5  
 BOND O1 LP1A O1 LP1B  
 BOND O2 LP2A O2 LP2B  
 BOND O3 LP3A O3 LP3B  
 BOND O4 LP4A O4 LP4B O4 LPX4  
 BOND O5 LP5A O5 LP5B

LONEPAIR relative LP1A O1 C1 HO1 distance 0.35 angle 110.0 dihe 91.0  
 LONEPAIR relative LP1B O1 C1 HO1 distance 0.35 angle 110.0 dihe 269.0  
 ANISOTROPY O1 C1 LP1A LP1B A11 0.8108 A22 1.2162

LONEPAIR relative LP2A O2 C2 HO2 distance 0.35 angle 110.0 dihe 91.0  
 LONEPAIR relative LP2B O2 C2 HO2 distance 0.35 angle 110.0 dihe 269.0  
 ANISOTROPY O2 C2 LP2A LP2B A11 0.8108 A22 1.2162

LONEPAIR relative LP3A O3 C3 HO3 distance 0.35 angle 110.0 dihe 91.0  
 LONEPAIR relative LP3B O3 C3 HO3 distance 0.35 angle 110.0 dihe 269.0  
 ANISOTROPY O3 C3 LP3A LP3B A11 0.8108 A22 1.2162

LONEPAIR bisector LP4A O4 C1 C4 distance 0.35 angle 110.0 dihe 90.0  
 LONEPAIR bisector LP4B O4 C1 C4 distance 0.35 angle 110.0 dihe 270.0  
 LONEPAIR bisector LPX4 O4 C1 C4 distance 0.10 angle 0.0 dihe 0.0  
 ANISOTROPY O4 LPX4 LP4A LP4B A11 0.8889 A22 1.2222  
 LONEPAIR relative LP5A O5 C5 HO5 distance 0.35 angle 110.0 dihe 91.0  
 LONEPAIR relative LP5B O5 C5 HO5 distance 0.35 angle 110.0 dihe 269.0  
 ANISOTROPY O5 C5 LP5A LP5B A11 0.8108 A22 1.2162

! IC table; from minimized geometry\*

|    |    |    |     |     |        |        |         |        |        |
|----|----|----|-----|-----|--------|--------|---------|--------|--------|
| IC | C4 | O4 | C1  | C2  | 1.4343 | 107.06 | -43.51  | 102.91 | 1.5564 |
| IC | O4 | C1 | C2  | C3  | 1.4227 | 102.91 | 29.68   | 103.27 | 1.5615 |
| IC | C1 | C2 | C3  | C4  | 1.5564 | 103.27 | -6.90   | 103.97 | 1.5386 |
| IC | C3 | O4 | *C4 | C5  | 1.5386 | 104.85 | 125.17  | 112.30 | 1.5446 |
| IC | C3 | O4 | *C4 | H4  | 1.5386 | 104.85 | -116.42 | 106.12 | 1.1143 |
| IC | O4 | C4 | C5  | O5  | 1.4343 | 112.30 | -178.59 | 110.88 | 1.4293 |
| IC | C4 | C5 | O5  | HO5 | 1.5446 | 110.88 | -86.85  | 110.49 | 0.9639 |
| IC | O5 | C4 | *C5 | H51 | 1.4293 | 110.88 | 119.78  | 108.95 | 1.1027 |
| IC | O5 | C4 | *C5 | H52 | 1.4293 | 110.88 | -122.02 | 109.96 | 1.1020 |
| IC | C2 | O4 | *C1 | O1  | 1.5564 | 102.91 | -122.54 | 109.76 | 1.4025 |
| IC | O4 | C1 | O1  | HO1 | 1.4227 | 109.76 | 66.79   | 107.33 | 0.9584 |
| IC | C2 | O4 | *C1 | H1  | 1.5564 | 102.91 | 117.68  | 108.69 | 1.1117 |
| IC | C3 | C1 | *C2 | H2  | 1.5615 | 103.27 | -113.35 | 106.87 | 1.1124 |
| IC | C3 | C1 | *C2 | O2  | 1.5615 | 103.27 | 127.46  | 116.16 | 1.4278 |
| IC | C1 | C2 | O2  | HO2 | 1.5564 | 116.16 | -81.77  | 106.00 | 0.9665 |
| IC | C2 | C4 | *C3 | O3  | 1.5615 | 103.97 | -125.04 | 111.07 | 1.4263 |

|       |    |     |     |        |        |        |        |        |
|-------|----|-----|-----|--------|--------|--------|--------|--------|
| IC C2 | C4 | *C3 | H3  | 1.5615 | 103.97 | 115.28 | 109.94 | 1.1126 |
| IC C4 | C3 | O3  | HO3 | 1.5386 | 111.07 | -77.15 | 108.40 | 0.9644 |
| IC C2 | C4 | *C3 | H4  | 1.5615 | 103.97 | -95.69 | 28.61  | 2.1867 |

RESI AARB 0.000 ! alpha-Arabinose

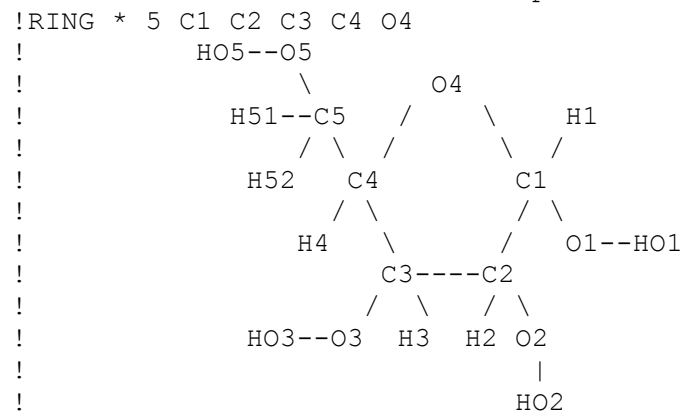

GROUP

|                             |        |        |                                       |        |       |       |
|-----------------------------|--------|--------|---------------------------------------|--------|-------|-------|
| ATOM O4                     | OD305A | 0.000  | ALPHA                                 | -0.684 | THOLE | 2.074 |
| ATOM C1                     | CD31FA | 0.124  | ALPHA                                 | -1.022 | THOLE | 0.462 |
| ATOM H1                     | HDA1A  | 0.070  |                                       |        |       |       |
| ATOM O1                     | OD31E  | 0.000  | ALPHA                                 | -1.176 | THOLE | 1.559 |
| ATOM HO1                    | HDP1A  | 0.333  |                                       |        |       |       |
| ATOM C4                     | CD31FC | 0.112  | ALPHA                                 | -1.014 | THOLE | 0.820 |
| ATOM H4                     | HDA2E  | 0.069  |                                       |        |       |       |
| ATOM LP1A                   | LPD    | -0.202 |                                       |        |       |       |
| ATOM LP1B                   | LPD    | -0.202 |                                       |        |       |       |
| ATOM LP4A                   | LPD    | -0.152 |                                       |        |       |       |
| ATOM LP4B                   | LPD    | -0.152 |                                       |        |       |       |
| ATOM LPX4                   | LPD    | 0.000  | !dummy for anisotropic polarizability |        |       |       |
| GROUP ! taken from ETOH     |        |        |                                       |        |       |       |
| ATOM C5                     | CD32A  | -0.086 | ALPHA                                 | -1.805 | THOLE | 0.353 |
| ATOM H51                    | HDA2A  | 0.080  |                                       |        |       |       |
| ATOM H52                    | HDA2A  | 0.080  |                                       |        |       |       |
| ATOM O5                     | OD31A  | 0.000  | ALPHA                                 | -0.732 | THOLE | 1.027 |
| ATOM HO5                    | HDP1A  | 0.328  |                                       |        |       |       |
| ATOM LP5A                   | LPD    | -0.201 |                                       |        |       |       |
| ATOM LP5B                   | LPD    | -0.201 |                                       |        |       |       |
| GROUP ! taken from glycerol |        |        |                                       |        |       |       |
| ATOM C2                     | CD31FB | -0.006 | ALPHA                                 | -1.438 | THOLE | 1.015 |
| ATOM H2                     | HDA1A  | 0.070  |                                       |        |       |       |
| ATOM O2                     | OD31E  | 0.000  | ALPHA                                 | -0.940 | THOLE | 0.670 |
| ATOM HO2                    | HDP1A  | 0.322  |                                       |        |       |       |
| ATOM LP2A                   | LPD    | -0.193 |                                       |        |       |       |
| ATOM LP2B                   | LPD    | -0.193 |                                       |        |       |       |
| GROUP ! taken from glycerol |        |        |                                       |        |       |       |
| ATOM C3                     | CD31FB | -0.006 | ALPHA                                 | -1.127 | THOLE | 1.340 |
| ATOM H3                     | HDA1A  | 0.070  |                                       |        |       |       |
| ATOM O3                     | OD31E  | 0.000  | ALPHA                                 | -0.881 | THOLE | 0.328 |
| ATOM HO3                    | HDP1A  | 0.322  |                                       |        |       |       |
| ATOM LP3A                   | LPD    | -0.193 |                                       |        |       |       |
| ATOM LP3B                   | LPD    | -0.193 |                                       |        |       |       |

!



BOND O4 C1 C1 H1 C1 O1 O1 HO1  
 BOND C1 C2 C2 H2 C2 O2 O2 HO2  
 BOND C2 C3 C3 H3 C3 O3 O3 HO3  
 BOND C3 C4 C4 H4 C4 C5 C4 O4  
 BOND C5 H51 C5 H52 C5 O5 O5 HO5  
 BOND O1 LP1A O1 LP1B  
 BOND O2 LP2A O2 LP2B  
 BOND O3 LP3A O3 LP3B  
 BOND O4 LP4A O4 LP4B O4 LPX4  
 BOND O5 LP5A O5 LP5B

LONEPAIR relative LP1A O1 C1 HO1 distance 0.35 angle 110.0 dihe 91.0  
 LONEPAIR relative LP1B O1 C1 HO1 distance 0.35 angle 110.0 dihe 269.0  
 ANISOTROPY O1 C1 LP1A LP1B A11 0.8108 A22 1.2162

LONEPAIR relative LP2A O2 C2 HO2 distance 0.35 angle 110.0 dihe 91.0  
 LONEPAIR relative LP2B O2 C2 HO2 distance 0.35 angle 110.0 dihe 269.0  
 ANISOTROPY O2 C2 LP2A LP2B A11 0.8108 A22 1.2162

LONEPAIR relative LP3A O3 C3 HO3 distance 0.35 angle 110.0 dihe 91.0  
 LONEPAIR relative LP3B O3 C3 HO3 distance 0.35 angle 110.0 dihe 269.0  
 ANISOTROPY O3 C3 LP3A LP3B A11 0.8108 A22 1.2162

LONEPAIR bisector LP4A O4 C1 C4 distance 0.35 angle 110.0 dihe 90.0  
 LONEPAIR bisector LP4B O4 C1 C4 distance 0.35 angle 110.0 dihe 270.0  
 LONEPAIR bisector LPX4 O4 C1 C4 distance 0.10 angle 0.0 dihe 0.0  
 ANISOTROPY O4 LPX4 LP4A LP4B A11 0.8889 A22 1.2222

LONEPAIR relative LP5A O5 C5 HO5 distance 0.35 angle 110.0 dihe 91.0  
 LONEPAIR relative LP5B O5 C5 HO5 distance 0.35 angle 110.0 dihe 269.0  
 ANISOTROPY O5 C5 LP5A LP5B A11 0.8108 A22 1.2162

! IC table; from minimized geometry\*

|    |    |    |     |     |        |        |         |        |        |
|----|----|----|-----|-----|--------|--------|---------|--------|--------|
| IC | C4 | O4 | C1  | C2  | 1.4319 | 108.67 | -17.05  | 106.71 | 1.5578 |
| IC | O4 | C1 | C2  | C3  | 1.4302 | 106.71 | -10.12  | 102.15 | 1.5355 |
| IC | C1 | C2 | C3  | C4  | 1.5578 | 102.15 | 31.25   | 101.91 | 1.5267 |
| IC | C3 | O4 | *C4 | C5  | 1.5267 | 102.62 | 124.20  | 112.49 | 1.5454 |
| IC | C3 | O4 | *C4 | H4  | 1.5267 | 102.62 | -115.89 | 106.69 | 1.1135 |
| IC | O4 | C4 | C5  | O5  | 1.4319 | 112.49 | -179.23 | 111.10 | 1.4305 |
| IC | C4 | C5 | O5  | HO5 | 1.5454 | 111.10 | -93.06  | 110.47 | 0.9646 |
| IC | O5 | C4 | *C5 | H51 | 1.4305 | 111.10 | 119.95  | 108.87 | 1.1029 |
| IC | O5 | C4 | *C5 | H52 | 1.4305 | 111.10 | -122.01 | 109.82 | 1.1021 |
| IC | C2 | O4 | *C1 | O1  | 1.5578 | 106.71 | 122.01  | 110.02 | 1.3992 |
| IC | O4 | C1 | O1  | HO1 | 1.4302 | 110.02 | 65.19   | 106.88 | 0.9590 |
| IC | C2 | O4 | *C1 | H1  | 1.5578 | 106.71 | -118.66 | 107.16 | 1.1129 |
| IC | C3 | C1 | *C2 | H2  | 1.5355 | 102.15 | 115.71  | 109.19 | 1.1138 |
| IC | C3 | C1 | *C2 | O2  | 1.5355 | 102.15 | -121.95 | 114.37 | 1.4285 |
| IC | C1 | C2 | O2  | HO2 | 1.5578 | 114.37 | -171.75 | 108.32 | 0.9638 |
| IC | C2 | C4 | *C3 | O3  | 1.5355 | 101.91 | -122.00 | 112.32 | 1.4206 |
| IC | C2 | C4 | *C3 | H3  | 1.5355 | 101.91 | 116.42  | 109.37 | 1.1143 |
| IC | C4 | C3 | O3  | HO3 | 1.5267 | 112.32 | -53.24  | 107.21 | 0.9692 |
| IC | C2 | C4 | *C3 | H4  | 1.5355 | 101.91 | -71.04  | 28.67  | 2.1783 |

!

RESI BARB 0.000 ! beta-Arabinose

!RING \* 5 C1 C2 C3 C4 O4

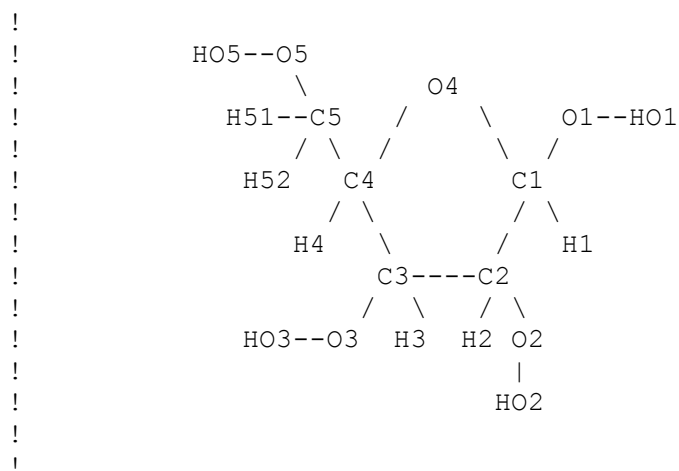

GROUP

|                             |        |        |                                       |        |       |       |
|-----------------------------|--------|--------|---------------------------------------|--------|-------|-------|
| ATOM O4                     | OD305A | 0.000  | ALPHA                                 | -0.684 | THOLE | 2.074 |
| ATOM C1                     | CD31FA | 0.124  | ALPHA                                 | -1.022 | THOLE | 0.462 |
| ATOM H1                     | HDA1A  | 0.070  |                                       |        |       |       |
| ATOM O1                     | OD31E  | 0.000  | ALPHA                                 | -1.176 | THOLE | 1.559 |
| ATOM HO1                    | HDP1A  | 0.333  |                                       |        |       |       |
| ATOM C4                     | CD31FC | 0.112  | ALPHA                                 | -1.014 | THOLE | 0.820 |
| ATOM H4                     | HDA2E  | 0.069  |                                       |        |       |       |
| ATOM LP1A                   | LPD    | -0.202 |                                       |        |       |       |
| ATOM LP1B                   | LPD    | -0.202 |                                       |        |       |       |
| ATOM LP4A                   | LPD    | -0.152 |                                       |        |       |       |
| ATOM LP4B                   | LPD    | -0.152 |                                       |        |       |       |
| ATOM LPX4                   | LPD    | 0.000  | !dummy for anisotropic polarizability |        |       |       |
| GROUP ! taken from ETOH     |        |        |                                       |        |       |       |
| ATOM C5                     | CD32A  | -0.086 | ALPHA                                 | -1.805 | THOLE | 0.353 |
| ATOM H51                    | HDA2A  | 0.080  |                                       |        |       |       |
| ATOM H52                    | HDA2A  | 0.080  |                                       |        |       |       |
| ATOM O5                     | OD31A  | 0.000  | ALPHA                                 | -0.732 | THOLE | 1.027 |
| ATOM HO5                    | HDP1A  | 0.328  |                                       |        |       |       |
| ATOM LP5A                   | LPD    | -0.201 |                                       |        |       |       |
| ATOM LP5B                   | LPD    | -0.201 |                                       |        |       |       |
| GROUP ! taken from glycerol |        |        |                                       |        |       |       |
| ATOM C2                     | CD31FB | -0.006 | ALPHA                                 | -1.438 | THOLE | 1.015 |
| ATOM H2                     | HDA1A  | 0.070  |                                       |        |       |       |
| ATOM O2                     | OD31E  | 0.000  | ALPHA                                 | -0.940 | THOLE | 0.670 |
| ATOM HO2                    | HDP1A  | 0.322  |                                       |        |       |       |
| ATOM LP2A                   | LPD    | -0.193 |                                       |        |       |       |
| ATOM LP2B                   | LPD    | -0.193 |                                       |        |       |       |
| GROUP ! taken from glycerol |        |        |                                       |        |       |       |
| ATOM C3                     | CD31FB | -0.006 | ALPHA                                 | -1.127 | THOLE | 1.340 |
| ATOM H3                     | HDA1A  | 0.070  |                                       |        |       |       |
| ATOM O3                     | OD31E  | 0.000  | ALPHA                                 | -0.881 | THOLE | 0.328 |
| ATOM HO3                    | HDP1A  | 0.322  |                                       |        |       |       |
| ATOM LP3A                   | LPD    | -0.193 |                                       |        |       |       |
| ATOM LP3B                   | LPD    | -0.193 |                                       |        |       |       |

!  
BOND O4 C1 C1 H1 C1 O1 O1 HO1  
BOND C1 C2 C2 H2 C2 O2 O2 HO2

BOND C2 C3 C3 H3 C3 O3 O3 HO3  
 BOND C3 C4 C4 H4 C4 C5 C4 O4  
 BOND C5 H51 C5 H52 C5 O5 O5 HO5  
 BOND O1 LP1A O1 LP1B  
 BOND O2 LP2A O2 LP2B  
 BOND O3 LP3A O3 LP3B  
 BOND O4 LP4A O4 LP4B O4 LPX4  
 BOND O5 LP5A O5 LP5B

LONEPAIR relative LP1A O1 C1 HO1 distance 0.35 angle 110.0 dihe 91.0  
 LONEPAIR relative LP1B O1 C1 HO1 distance 0.35 angle 110.0 dihe 269.0  
 ANISOTROPY O1 C1 LP1A LP1B A11 0.8108 A22 1.2162

LONEPAIR relative LP2A O2 C2 HO2 distance 0.35 angle 110.0 dihe 91.0  
 LONEPAIR relative LP2B O2 C2 HO2 distance 0.35 angle 110.0 dihe 269.0  
 ANISOTROPY O2 C2 LP2A LP2B A11 0.8108 A22 1.2162

LONEPAIR relative LP3A O3 C3 HO3 distance 0.35 angle 110.0 dihe 91.0  
 LONEPAIR relative LP3B O3 C3 HO3 distance 0.35 angle 110.0 dihe 269.0  
 ANISOTROPY O3 C3 LP3A LP3B A11 0.8108 A22 1.2162

LONEPAIR bisector LP4A O4 C1 C4 distance 0.35 angle 110.0 dihe 90.0  
 LONEPAIR bisector LP4B O4 C1 C4 distance 0.35 angle 110.0 dihe 270.0  
 LONEPAIR bisector LPX4 O4 C1 C4 distance 0.10 angle 0.0 dihe 0.0  
 ANISOTROPY O4 LPX4 LP4A LP4B A11 0.8889 A22 1.2222

LONEPAIR relative LP5A O5 C5 HO5 distance 0.35 angle 110.0 dihe 91.0  
 LONEPAIR relative LP5B O5 C5 HO5 distance 0.35 angle 110.0 dihe 269.0  
 ANISOTROPY O5 C5 LP5A LP5B A11 0.8108 A22 1.2162

! IC table; from minimized geometry\*

|    |    |    |     |     |        |        |         |        |        |
|----|----|----|-----|-----|--------|--------|---------|--------|--------|
| IC | C4 | O4 | C1  | C2  | 1.4319 | 108.67 | -17.05  | 106.71 | 1.5578 |
| IC | O4 | C1 | C2  | C3  | 1.4302 | 106.71 | -10.12  | 102.15 | 1.5355 |
| IC | C1 | C2 | C3  | C4  | 1.5578 | 102.15 | 31.25   | 101.91 | 1.5267 |
| IC | C3 | O4 | *C4 | C5  | 1.5267 | 102.62 | 124.20  | 112.49 | 1.5454 |
| IC | C3 | O4 | *C4 | H4  | 1.5267 | 102.62 | -115.89 | 106.69 | 1.1135 |
| IC | O4 | C4 | C5  | O5  | 1.4319 | 112.49 | -179.23 | 111.10 | 1.4305 |
| IC | C4 | C5 | O5  | HO5 | 1.5454 | 111.10 | -93.06  | 110.47 | 0.9646 |
| IC | O5 | C4 | *C5 | H51 | 1.4305 | 111.10 | 119.95  | 108.87 | 1.1029 |
| IC | O5 | C4 | *C5 | H52 | 1.4305 | 111.10 | -122.01 | 109.82 | 1.1021 |
| IC | C2 | O4 | *C1 | O1  | 1.5578 | 106.71 | -122.01 | 110.02 | 1.3992 |
| IC | O4 | C1 | O1  | HO1 | 1.4302 | 110.02 | 65.19   | 106.88 | 0.9590 |
| IC | C2 | O4 | *C1 | H1  | 1.5578 | 106.71 | 118.66  | 107.16 | 1.1129 |
| IC | C3 | C1 | *C2 | H2  | 1.5355 | 102.15 | 115.71  | 109.19 | 1.1138 |
| IC | C3 | C1 | *C2 | O2  | 1.5355 | 102.15 | -121.95 | 114.37 | 1.4285 |
| IC | C1 | C2 | O2  | HO2 | 1.5578 | 114.37 | -171.75 | 108.32 | 0.9638 |
| IC | C2 | C4 | *C3 | O3  | 1.5355 | 101.91 | -122.00 | 112.32 | 1.4206 |
| IC | C2 | C4 | *C3 | H3  | 1.5355 | 101.91 | 116.42  | 109.37 | 1.1143 |
| IC | C4 | C3 | O3  | HO3 | 1.5267 | 112.32 | -53.24  | 107.21 | 0.9692 |
| IC | C2 | C4 | *C3 | H4  | 1.5355 | 101.91 | -71.04  | 28.67  | 2.1783 |

RESI AXYF 0.000 ! alpha-Xylofuranose  
 !RING \* 5 C1 C2 C3 C4 O4  
 ! HO5--O5

```

!
!           \          O4
!        H51--C5  /          \          H1
!           / \      /          \      /
!        H52  C4    C1
!           / \      / \       \
!        H4   \   /   O1--HO1
!           C3----C2
!           / \   / \
!        H3  O3  O2  H2
!           |   |
!        HO3  HO2
!
GROUP
ATOM O4    OD305A    0.000    ALPHA  -0.684    THOLE  2.074
ATOM C1    CD31FA    0.124    ALPHA  -1.022    THOLE  0.462
ATOM H1    HDA1A     0.070
ATOM O1    OD31E     0.000    ALPHA  -1.176    THOLE  1.559
ATOM HO1   HDP1A     0.333
ATOM C4    CD31FC    0.112    ALPHA  -1.014    THOLE  0.820
ATOM H4    HDA2E     0.069
ATOM LP1A  LPD       -0.202
ATOM LP1B  LPD       -0.202
ATOM LP4A  LPD       -0.152
ATOM LP4B  LPD       -0.152
ATOM LPX4  LPD        0.000    !dummy for anisotropic polarizability
GROUP ! taken from ETOH
ATOM C5    CD32A    -0.086    ALPHA  -1.805    THOLE  0.353
ATOM H51   HDA2A     0.080
ATOM H52   HDA2A     0.080
ATOM O5    OD31A     0.000    ALPHA  -0.732    THOLE  1.027
ATOM HO5   HDP1A     0.328
ATOM LP5A  LPD       -0.201
ATOM LP5B  LPD       -0.201
GROUP ! taken from glycerol
ATOM C2    CD31FB    -0.006    ALPHA  -1.438    THOLE  1.015
ATOM H2    HDA1A     0.070
ATOM O2    OD31E     0.000    ALPHA  -0.940    THOLE  0.670
ATOM HO2   HDP1A     0.322
ATOM LP2A  LPD       -0.193
ATOM LP2B  LPD       -0.193
GROUP ! taken from glycerol
ATOM C3    CD31FB    -0.006    ALPHA  -1.127    THOLE  1.340
ATOM H3    HDA1A     0.070
ATOM O3    OD31E     0.000    ALPHA  -0.881    THOLE  0.328
ATOM HO3   HDP1A     0.322
ATOM LP3A  LPD       -0.193
ATOM LP3B  LPD       -0.193
!
BOND O4 C1  C1 H1   C1 O1   O1 HO1
BOND C1 C2  C2 H2   C2 O2   O2 HO2
BOND C2 C3  C3 H3   C3 O3   O3 HO3
BOND C3 C4  C4 H4   C4 C5   C4 O4
BOND C5 H51 C5 H52  C5 O5   O5 HO5
BOND O1 LP1A O1 LP1B
BOND O2 LP2A O2 LP2B

```

BOND O3 LP3A O3 LP3B  
 BOND O4 LP4A O4 LP4B O4 LPX4  
 BOND O5 LP5A O5 LP5B

LONEPAIR relative LP1A O1 C1 HO1 distance 0.35 angle 110.0 dihe 91.0  
 LONEPAIR relative LP1B O1 C1 HO1 distance 0.35 angle 110.0 dihe 269.0  
 ANISOTROPY O1 C1 LP1A LP1B A11 0.8108 A22 1.2162

LONEPAIR relative LP2A O2 C2 HO2 distance 0.35 angle 110.0 dihe 91.0  
 LONEPAIR relative LP2B O2 C2 HO2 distance 0.35 angle 110.0 dihe 269.0  
 ANISOTROPY O2 C2 LP2A LP2B A11 0.8108 A22 1.2162

LONEPAIR relative LP3A O3 C3 HO3 distance 0.35 angle 110.0 dihe 91.0  
 LONEPAIR relative LP3B O3 C3 HO3 distance 0.35 angle 110.0 dihe 269.0  
 ANISOTROPY O3 C3 LP3A LP3B A11 0.8108 A22 1.2162

LONEPAIR bisector LP4A O4 C1 C4 distance 0.35 angle 110.0 dihe 90.0  
 LONEPAIR bisector LP4B O4 C1 C4 distance 0.35 angle 110.0 dihe 270.0  
 LONEPAIR bisector LPX4 O4 C1 C4 distance 0.10 angle 0.0 dihe 0.0  
 ANISOTROPY O4 LPX4 LP4A LP4B A11 0.8889 A22 1.2222

LONEPAIR relative LP5A O5 C5 HO5 distance 0.35 angle 110.0 dihe 91.0  
 LONEPAIR relative LP5B O5 C5 HO5 distance 0.35 angle 110.0 dihe 269.0  
 ANISOTROPY O5 C5 LP5A LP5B A11 0.8108 A22 1.2162

! IC table; from minimized geometry\*

|    |    |    |     |     |        |        |         |        |        |
|----|----|----|-----|-----|--------|--------|---------|--------|--------|
| IC | C4 | O4 | C1  | C2  | 1.4368 | 109.21 | 7.17    | 106.92 | 1.5609 |
| IC | O4 | C1 | C2  | C3  | 1.4288 | 106.92 | -29.31  | 100.61 | 1.5256 |
| IC | C1 | C2 | C3  | C4  | 1.5609 | 100.61 | 38.33   | 101.22 | 1.5366 |
| IC | C3 | O4 | *C4 | C5  | 1.5366 | 105.95 | 126.07  | 111.10 | 1.5466 |
| IC | C3 | O4 | *C4 | H4  | 1.5366 | 105.95 | -115.62 | 106.41 | 1.1129 |
| IC | O4 | C4 | C5  | O5  | 1.4368 | 111.10 | -170.12 | 111.17 | 1.4292 |
| IC | C4 | C5 | O5  | HO5 | 1.5466 | 111.17 | -86.81  | 110.69 | 0.9637 |
| IC | O5 | C4 | *C5 | H51 | 1.4292 | 111.17 | 119.44  | 108.73 | 1.1031 |
| IC | O5 | C4 | *C5 | H52 | 1.4292 | 111.17 | -122.76 | 110.12 | 1.1017 |
| IC | C2 | O4 | *C1 | O1  | 1.5609 | 106.92 | 123.12  | 110.19 | 1.4024 |
| IC | O4 | C1 | O1  | HO1 | 1.4288 | 110.19 | 60.16   | 106.38 | 0.9603 |
| IC | C2 | O4 | *C1 | H1  | 1.5609 | 106.92 | -117.24 | 106.84 | 1.1130 |
| IC | C3 | C1 | *C2 | H2  | 1.5256 | 100.61 | -119.80 | 111.22 | 1.1086 |
| IC | C3 | C1 | *C2 | O2  | 1.5256 | 100.61 | 116.99  | 113.84 | 1.4299 |
| IC | C1 | C2 | O2  | HO2 | 1.5609 | 113.84 | 25.15   | 106.11 | 0.9678 |
| IC | C2 | C4 | *C3 | O3  | 1.5256 | 101.22 | 116.82  | 111.32 | 1.4223 |
| IC | C2 | C4 | *C3 | H3  | 1.5256 | 101.22 | -120.45 | 112.39 | 1.1104 |
| IC | C4 | C3 | O3  | HO3 | 1.5366 | 111.32 | 68.17   | 107.50 | 0.9664 |
| IC | C2 | C4 | *C3 | H4  | 1.5256 | 101.22 | -77.82  | 29.09  | 2.1676 |

RESI BXYF 0.000 ! beta-Xylofuranose

```
!RING * 5 C1 C2 C3 C4 O4
!
!      HO5--O5
!      |
!      O4
!      |
!      H51--C5 / \ O1--HO1
!      / \ / \ / \
!      H52  C4  C1
!      / \ / \
!
```

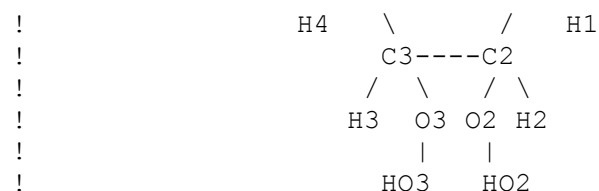

GROUP

|           |        |        |                                       |        |       |       |
|-----------|--------|--------|---------------------------------------|--------|-------|-------|
| ATOM O4   | OD305A | 0.000  | ALPHA                                 | -0.684 | THOLE | 2.074 |
| ATOM C1   | CD31FA | 0.124  | ALPHA                                 | -1.022 | THOLE | 0.462 |
| ATOM H1   | HDA1A  | 0.070  |                                       |        |       |       |
| ATOM O1   | OD31E  | 0.000  | ALPHA                                 | -1.176 | THOLE | 1.559 |
| ATOM HO1  | HDP1A  | 0.333  |                                       |        |       |       |
| ATOM C4   | CD31FC | 0.112  | ALPHA                                 | -1.014 | THOLE | 0.820 |
| ATOM H4   | HDA2E  | 0.069  |                                       |        |       |       |
| ATOM LP1A | LPD    | -0.202 |                                       |        |       |       |
| ATOM LP1B | LPD    | -0.202 |                                       |        |       |       |
| ATOM LP4A | LPD    | -0.152 |                                       |        |       |       |
| ATOM LP4B | LPD    | -0.152 |                                       |        |       |       |
| ATOM LPX4 | LPD    | 0.000  | !dummy for anisotropic polarizability |        |       |       |

GROUP ! taken from ETOH

|           |       |        |       |        |       |       |
|-----------|-------|--------|-------|--------|-------|-------|
| ATOM C5   | CD32A | -0.086 | ALPHA | -1.805 | THOLE | 0.353 |
| ATOM H51  | HDA2A | 0.080  |       |        |       |       |
| ATOM H52  | HDA2A | 0.080  |       |        |       |       |
| ATOM O5   | OD31A | 0.000  | ALPHA | -0.732 | THOLE | 1.027 |
| ATOM HO5  | HDP1A | 0.328  |       |        |       |       |
| ATOM LP5A | LPD   | -0.201 |       |        |       |       |
| ATOM LP5B | LPD   | -0.201 |       |        |       |       |

GROUP ! taken from glycerol

|           |        |        |       |        |       |       |
|-----------|--------|--------|-------|--------|-------|-------|
| ATOM C2   | CD31FB | -0.006 | ALPHA | -1.438 | THOLE | 1.015 |
| ATOM H2   | HDA1A  | 0.070  |       |        |       |       |
| ATOM O2   | OD31E  | 0.000  | ALPHA | -0.940 | THOLE | 0.670 |
| ATOM HO2  | HDP1A  | 0.322  |       |        |       |       |
| ATOM LP2A | LPD    | -0.193 |       |        |       |       |
| ATOM LP2B | LPD    | -0.193 |       |        |       |       |

GROUP ! taken from glycerol

|           |        |        |       |        |       |       |
|-----------|--------|--------|-------|--------|-------|-------|
| ATOM C3   | CD31FB | -0.006 | ALPHA | -1.127 | THOLE | 1.340 |
| ATOM H3   | HDA1A  | 0.070  |       |        |       |       |
| ATOM O3   | OD31E  | 0.000  | ALPHA | -0.881 | THOLE | 0.328 |
| ATOM HO3  | HDP1A  | 0.322  |       |        |       |       |
| ATOM LP3A | LPD    | -0.193 |       |        |       |       |
| ATOM LP3B | LPD    | -0.193 |       |        |       |       |

!

|              |         |         |        |
|--------------|---------|---------|--------|
| BOND O4 C1   | C1 H1   | C1 O1   | O1 HO1 |
| BOND C1 C2   | C2 H2   | C2 O2   | O2 HO2 |
| BOND C2 C3   | C3 H3   | C3 O3   | O3 HO3 |
| BOND C3 C4   | C4 H4   | C4 C5   | C4 O4  |
| BOND C5 H51  | C5 H52  | C5 O5   | O5 HO5 |
| BOND O1 LP1A | O1 LP1B |         |        |
| BOND O2 LP2A | O2 LP2B |         |        |
| BOND O3 LP3A | O3 LP3B |         |        |
| BOND O4 LP4A | O4 LP4B | O4 LPX4 |        |
| BOND O5 LP5A | O5 LP5B |         |        |

LONEPAIR relative LP1A O1 C1 HO1 distance 0.35 angle 110.0 dihe 91.0

LONEPAIR relative LP1B O1 C1 HO1 distance 0.35 angle 110.0 dihe 269.0  
ANISOTROPY O1 C1 LP1A LP1B A11 0.8108 A22 1.2162

LONEPAIR relative LP2A O2 C2 HO2 distance 0.35 angle 110.0 dihe 91.0  
LONEPAIR relative LP2B O2 C2 HO2 distance 0.35 angle 110.0 dihe 269.0  
ANISOTROPY O2 C2 LP2A LP2B A11 0.8108 A22 1.2162

LONEPAIR relative LP3A O3 C3 HO3 distance 0.35 angle 110.0 dihe 91.0  
LONEPAIR relative LP3B O3 C3 HO3 distance 0.35 angle 110.0 dihe 269.0  
ANISOTROPY O3 C3 LP3A LP3B A11 0.8108 A22 1.2162

LONEPAIR bisector LP4A O4 C1 C4 distance 0.35 angle 110.0 dihe 90.0  
LONEPAIR bisector LP4B O4 C1 C4 distance 0.35 angle 110.0 dihe 270.0  
LONEPAIR bisector LPX4 O4 C1 C4 distance 0.10 angle 0.0 dihe 0.0  
ANISOTROPY O4 LPX4 LP4A LP4B A11 0.8889 A22 1.2222

LONEPAIR relative LP5A O5 C5 HO5 distance 0.35 angle 110.0 dihe 91.0  
LONEPAIR relative LP5B O5 C5 HO5 distance 0.35 angle 110.0 dihe 269.0  
ANISOTROPY O5 C5 LP5A LP5B A11 0.8108 A22 1.2162

! IC table; from minimized geometry\*

|    |    |    |     |     |        |        |         |        |        |
|----|----|----|-----|-----|--------|--------|---------|--------|--------|
| IC | C4 | O4 | C1  | C2  | 1.4368 | 109.21 | 7.17    | 106.92 | 1.5609 |
| IC | O4 | C1 | C2  | C3  | 1.4288 | 106.92 | -29.31  | 100.61 | 1.5256 |
| IC | C1 | C2 | C3  | C4  | 1.5609 | 100.61 | 38.33   | 101.22 | 1.5366 |
| IC | C3 | O4 | *C4 | C5  | 1.5366 | 105.95 | 126.07  | 111.10 | 1.5466 |
| IC | C3 | O4 | *C4 | H4  | 1.5366 | 105.95 | -115.62 | 106.41 | 1.1129 |
| IC | O4 | C4 | C5  | O5  | 1.4368 | 111.10 | -170.12 | 111.17 | 1.4292 |
| IC | C4 | C5 | O5  | HO5 | 1.5466 | 111.17 | -86.81  | 110.69 | 0.9637 |
| IC | O5 | C4 | *C5 | H51 | 1.4292 | 111.17 | 119.44  | 108.73 | 1.1031 |
| IC | O5 | C4 | *C5 | H52 | 1.4292 | 111.17 | -122.76 | 110.12 | 1.1017 |
| IC | C2 | O4 | *C1 | O1  | 1.5609 | 106.92 | -123.12 | 110.19 | 1.4024 |
| IC | O4 | C1 | O1  | HO1 | 1.4288 | 110.19 | 60.16   | 106.38 | 0.9603 |
| IC | C2 | O4 | *C1 | H1  | 1.5609 | 106.92 | 117.24  | 106.84 | 1.1130 |
| IC | C3 | C1 | *C2 | H2  | 1.5256 | 100.61 | -119.80 | 111.22 | 1.1086 |
| IC | C3 | C1 | *C2 | O2  | 1.5256 | 100.61 | 116.99  | 113.84 | 1.4299 |
| IC | C1 | C2 | O2  | HO2 | 1.5609 | 113.84 | 25.15   | 106.11 | 0.9678 |
| IC | C2 | C4 | *C3 | O3  | 1.5256 | 101.22 | 116.82  | 111.32 | 1.4223 |
| IC | C2 | C4 | *C3 | H3  | 1.5256 | 101.22 | -120.45 | 112.39 | 1.1104 |
| IC | C4 | C3 | O3  | HO3 | 1.5366 | 111.32 | 68.17   | 107.50 | 0.9664 |
| IC | C2 | C4 | *C3 | H4  | 1.5256 | 101.22 | -77.82  | 29.09  | 2.1676 |

RESI ALYF 0.000 ! alpha-lyxofuranose

!RING \* 5 C1 C2 C3 C4 O4

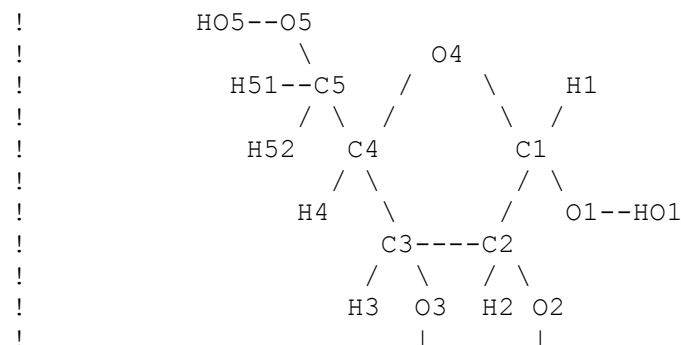

```

!
          HO3   HO2
GROUP
ATOM O4   OD305A   0.000   ALPHA -0.684 THOLE 2.074
ATOM C1   CD31FA   0.124   ALPHA -1.022 THOLE 0.462
ATOM H1   HDA1A    0.070
ATOM O1   OD31E    0.000   ALPHA -1.176 THOLE 1.559
ATOM HO1  HDP1A    0.333
ATOM C4   CD31FC   0.112   ALPHA -1.014 THOLE 0.820
ATOM H4   HDA2E    0.069
ATOM LP1A LPD      -0.202
ATOM LP1B LPD      -0.202
ATOM LP4A LPD      -0.152
ATOM LP4B LPD      -0.152
ATOM LPX4 LPD      0.000 !dummy for anisotropic polarizability
GROUP ! taken from ETOH
ATOM C5   CD32A   -0.086   ALPHA -1.805 THOLE 0.353
ATOM H51  HDA2A    0.080
ATOM H52  HDA2A    0.080
ATOM O5   OD31A    0.000   ALPHA -0.732 THOLE 1.027
ATOM HO5  HDP1A    0.328
ATOM LP5A LPD      -0.201
ATOM LP5B LPD      -0.201
GROUP ! taken from glycerol
ATOM C2   CD31FB  -0.006   ALPHA -1.438 THOLE 1.015
ATOM H2   HDA1A    0.070
ATOM O2   OD31E    0.000   ALPHA -0.940 THOLE 0.670
ATOM HO2  HDP1A    0.322
ATOM LP2A LPD      -0.193
ATOM LP2B LPD      -0.193
GROUP ! taken from glycerol
ATOM C3   CD31FB  -0.006   ALPHA -1.127 THOLE 1.340
ATOM H3   HDA1A    0.070
ATOM O3   OD31E    0.000   ALPHA -0.881 THOLE 0.328
ATOM HO3  HDP1A    0.322
ATOM LP3A LPD      -0.193
ATOM LP3B LPD      -0.193
!
BOND O4 C1 C1 H1 C1 O1 O1 HO1
BOND C1 C2 C2 H2 C2 O2 O2 HO2
BOND C2 C3 C3 H3 C3 O3 O3 HO3
BOND C3 C4 C4 H4 C4 C5 C4 O4
BOND C5 H51 C5 H52 C5 O5 O5 HO5
BOND O1 LP1A O1 LP1B
BOND O2 LP2A O2 LP2B
BOND O3 LP3A O3 LP3B
BOND O4 LP4A O4 LP4B O4 LPX4
BOND O5 LP5A O5 LP5B

LONEPAIR relative LP1A O1 C1 HO1 distance 0.35 angle 110.0 dihe 91.0
LONEPAIR relative LP1B O1 C1 HO1 distance 0.35 angle 110.0 dihe 269.0
ANISOTROPY O1 C1 LP1A LP1B A11 0.8108 A22 1.2162

LONEPAIR relative LP2A O2 C2 HO2 distance 0.35 angle 110.0 dihe 91.0
LONEPAIR relative LP2B O2 C2 HO2 distance 0.35 angle 110.0 dihe 269.0

```



ANISOTROPY O2 C2 LP2A LP2B A11 0.8108 A22 1.2162

LONEPAIR relative LP3A O3 C3 HO3 distance 0.35 angle 110.0 dihe 91.0  
LONEPAIR relative LP3B O3 C3 HO3 distance 0.35 angle 110.0 dihe 269.0  
ANISOTROPY O3 C3 LP3A LP3B A11 0.8108 A22 1.2162

LONEPAIR bisector LP4A O4 C1 C4 distance 0.35 angle 110.0 dihe 90.0  
LONEPAIR bisector LP4B O4 C1 C4 distance 0.35 angle 110.0 dihe 270.0  
LONEPAIR bisector LPX4 O4 C1 C4 distance 0.10 angle 0.0 dihe 0.0  
ANISOTROPY O4 LPX4 LP4A LP4B A11 0.8889 A22 1.2222

LONEPAIR relative LP5A O5 C5 HO5 distance 0.35 angle 110.0 dihe 91.0  
LONEPAIR relative LP5B O5 C5 HO5 distance 0.35 angle 110.0 dihe 269.0  
ANISOTROPY O5 C5 LP5A LP5B A11 0.8108 A22 1.2162

! IC table; from minimized geometry\*

|    |    |    |     |     |        |        |         |        |        |
|----|----|----|-----|-----|--------|--------|---------|--------|--------|
| IC | C4 | O4 | C1  | C2  | 1.4315 | 107.76 | -22.45  | 106.42 | 1.5606 |
| IC | O4 | C1 | C2  | C3  | 1.4298 | 106.42 | -6.06   | 102.41 | 1.5494 |
| IC | C1 | C2 | C3  | C4  | 1.5606 | 102.41 | 29.67   | 101.01 | 1.5315 |
| IC | C3 | O4 | *C4 | C5  | 1.5315 | 102.23 | 127.07  | 113.37 | 1.5469 |
| IC | C3 | O4 | *C4 | H4  | 1.5315 | 102.23 | -114.55 | 106.16 | 1.1145 |
| IC | O4 | C4 | C5  | O5  | 1.4315 | 113.37 | 172.78  | 110.88 | 1.4279 |
| IC | C4 | C5 | O5  | HO5 | 1.5469 | 110.88 | -89.23  | 111.11 | 0.9627 |
| IC | O5 | C4 | *C5 | H51 | 1.4279 | 110.88 | 120.67  | 109.96 | 1.1012 |
| IC | O5 | C4 | *C5 | H52 | 1.4279 | 110.88 | -120.92 | 109.55 | 1.1021 |
| IC | C2 | O4 | *C1 | O1  | 1.5606 | 106.42 | 121.62  | 109.95 | 1.3992 |
| IC | O4 | C1 | O1  | HO1 | 1.4298 | 109.95 | 66.51   | 107.28 | 0.9594 |
| IC | C2 | O4 | *C1 | H1  | 1.5606 | 106.42 | -119.08 | 107.39 | 1.1123 |
| IC | C3 | C1 | *C2 | H2  | 1.5494 | 102.41 | 115.35  | 109.45 | 1.1122 |
| IC | C3 | C1 | *C2 | O2  | 1.5494 | 102.41 | -123.37 | 114.05 | 1.4282 |
| IC | C1 | C2 | O2  | HO2 | 1.5606 | 114.05 | 104.03  | 106.69 | 0.9675 |
| IC | C2 | C4 | *C3 | O3  | 1.5494 | 101.01 | 118.58  | 111.21 | 1.4279 |
| IC | C2 | C4 | *C3 | H3  | 1.5494 | 101.01 | -119.18 | 112.30 | 1.1095 |
| IC | C4 | C3 | O3  | HO3 | 1.5315 | 111.21 | -32.26  | 108.53 | 0.9635 |
| IC | C2 | C4 | *C3 | H4  | 1.5494 | 101.01 | -68.34  | 28.96  | 2.1721 |

RESI BLYF 0.000 ! beta-lyxofuranose

!RING \* 5 C1 C2 C3 C4 O4

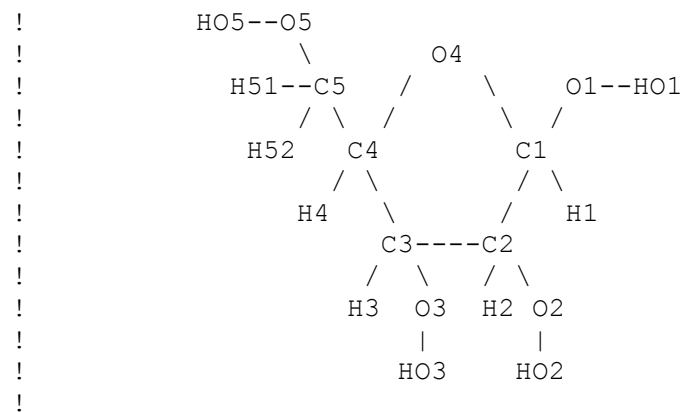

GROUP

ATOM O4 OD305A 0.000 ALPHA -0.684 THOLE 2.074

ATOM C1 CD31FA 0.124 ALPHA -1.022 THOLE 0.462

```

ATOM H1   HDA1A   0.070
ATOM O1   OD31E   0.000   ALPHA -1.176 THOLE 1.559
ATOM HO1  HDP1A   0.333
ATOM C4   CD31FC  0.112   ALPHA -1.014 THOLE 0.820
ATOM H4   HDA2E   0.069
ATOM LP1A LPD     -0.202
ATOM LP1B LPD     -0.202
ATOM LP4A LPD     -0.152
ATOM LP4B LPD     -0.152
ATOM LPX4 LPD     0.000 !dummy for anisotropic polarizability
GROUP ! taken from ETOH
ATOM C5   CD32A  -0.086   ALPHA -1.805 THOLE 0.353
ATOM H51  HDA2A   0.080
ATOM H52  HDA2A   0.080
ATOM O5   OD31A   0.000   ALPHA -0.732 THOLE 1.027
ATOM HO5  HDP1A   0.328
ATOM LP5A LPD     -0.201
ATOM LP5B LPD     -0.201
GROUP ! taken from glycerol
ATOM C2   CD31FB -0.006   ALPHA -1.438 THOLE 1.015
ATOM H2   HDA1A   0.070
ATOM O2   OD31E   0.000   ALPHA -0.940 THOLE 0.670
ATOM HO2  HDP1A   0.322
ATOM LP2A LPD     -0.193
ATOM LP2B LPD     -0.193
GROUP ! taken from glycerol
ATOM C3   CD31FB -0.006   ALPHA -1.127 THOLE 1.340
ATOM H3   HDA1A   0.070
ATOM O3   OD31E   0.000   ALPHA -0.881 THOLE 0.328
ATOM HO3  HDP1A   0.322
ATOM LP3A LPD     -0.193
ATOM LP3B LPD     -0.193
!
BOND O4 C1 C1 H1 C1 O1 O1 HO1
BOND C1 C2 C2 H2 C2 O2 O2 HO2
BOND C2 C3 C3 H3 C3 O3 O3 HO3
BOND C3 C4 C4 H4 C4 C5 C4 O4
BOND C5 H51 C5 H52 C5 O5 O5 HO5
BOND O1 LP1A O1 LP1B
BOND O2 LP2A O2 LP2B
BOND O3 LP3A O3 LP3B
BOND O4 LP4A O4 LP4B O4 LPX4
BOND O5 LP5A O5 LP5B

LONEPAIR relative LP1A O1 C1 HO1 distance 0.35 angle 110.0 dihe 91.0
LONEPAIR relative LP1B O1 C1 HO1 distance 0.35 angle 110.0 dihe 269.0
ANISOTROPY O1 C1 LP1A LP1B A11 0.8108 A22 1.2162

LONEPAIR relative LP2A O2 C2 HO2 distance 0.35 angle 110.0 dihe 91.0
LONEPAIR relative LP2B O2 C2 HO2 distance 0.35 angle 110.0 dihe 269.0
ANISOTROPY O2 C2 LP2A LP2B A11 0.8108 A22 1.2162

LONEPAIR relative LP3A O3 C3 HO3 distance 0.35 angle 110.0 dihe 91.0
LONEPAIR relative LP3B O3 C3 HO3 distance 0.35 angle 110.0 dihe 269.0

```

ANISOTROPY O3 C3 LP3A LP3B A11 0.8108 A22 1.2162

LONEPAIR bisector LP4A O4 C1 C4 distance 0.35 angle 110.0 dihe 90.0  
LONEPAIR bisector LP4B O4 C1 C4 distance 0.35 angle 110.0 dihe 270.0  
LONEPAIR bisector LPX4 O4 C1 C4 distance 0.10 angle 0.0 dihe 0.0  
ANISOTROPY O4 LPX4 LP4A LP4B A11 0.8889 A22 1.2222

LONEPAIR relative LP5A O5 C5 HO5 distance 0.35 angle 110.0 dihe 91.0  
LONEPAIR relative LP5B O5 C5 HO5 distance 0.35 angle 110.0 dihe 269.0  
ANISOTROPY O5 C5 LP5A LP5B A11 0.8108 A22 1.2162

! IC table; from minimized geometry\*

|    |    |    |     |     |        |        |         |        |        |
|----|----|----|-----|-----|--------|--------|---------|--------|--------|
| IC | C4 | O4 | C1  | C2  | 1.4315 | 107.76 | -22.45  | 106.42 | 1.5606 |
| IC | O4 | C1 | C2  | C3  | 1.4298 | 106.42 | -6.06   | 102.41 | 1.5494 |
| IC | C1 | C2 | C3  | C4  | 1.5606 | 102.41 | 29.67   | 101.01 | 1.5315 |
| IC | C3 | O4 | *C4 | C5  | 1.5315 | 102.23 | 127.07  | 113.37 | 1.5469 |
| IC | C3 | O4 | *C4 | H4  | 1.5315 | 102.23 | -114.55 | 106.16 | 1.1145 |
| IC | O4 | C4 | C5  | O5  | 1.4315 | 113.37 | 172.78  | 110.88 | 1.4279 |
| IC | C4 | C5 | O5  | HO5 | 1.5469 | 110.88 | -89.23  | 111.11 | 0.9627 |
| IC | O5 | C4 | *C5 | H51 | 1.4279 | 110.88 | 120.67  | 109.96 | 1.1012 |
| IC | O5 | C4 | *C5 | H52 | 1.4279 | 110.88 | -120.92 | 109.55 | 1.1021 |
| IC | C2 | O4 | *C1 | O1  | 1.5606 | 106.42 | -121.62 | 109.95 | 1.3992 |
| IC | O4 | C1 | O1  | HO1 | 1.4298 | 109.95 | 66.51   | 107.28 | 0.9594 |
| IC | C2 | O4 | *C1 | H1  | 1.5606 | 106.42 | 119.08  | 107.39 | 1.1123 |
| IC | C3 | C1 | *C2 | H2  | 1.5494 | 102.41 | 115.35  | 109.45 | 1.1122 |
| IC | C3 | C1 | *C2 | O2  | 1.5494 | 102.41 | -123.37 | 114.05 | 1.4282 |
| IC | C1 | C2 | O2  | HO2 | 1.5606 | 114.05 | 104.03  | 106.69 | 0.9675 |
| IC | C2 | C4 | *C3 | O3  | 1.5494 | 101.01 | 118.58  | 111.21 | 1.4279 |
| IC | C2 | C4 | *C3 | H3  | 1.5494 | 101.01 | -119.18 | 112.30 | 1.1095 |
| IC | C4 | C3 | O3  | HO3 | 1.5315 | 111.21 | -32.26  | 108.53 | 0.9635 |
| IC | C2 | C4 | *C3 | H4  | 1.5494 | 101.01 | -68.34  | 28.96  | 2.1721 |

RESI ADEO 0.000 ! alpha-Deoxy-Ribose

!RING \* 5 C1 C2 C3 C4 O4

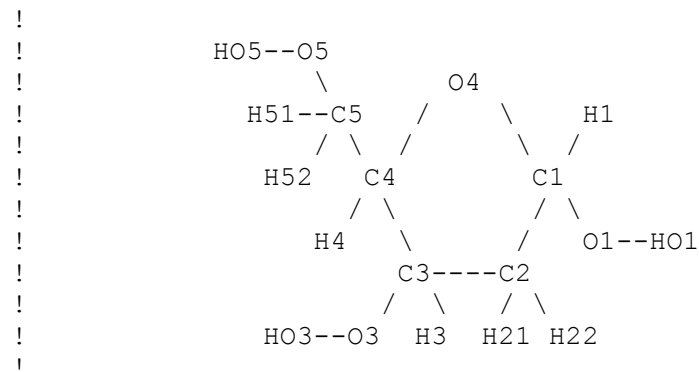

GROUP

|      |     |        |       |       |        |       |       |
|------|-----|--------|-------|-------|--------|-------|-------|
| ATOM | O4  | OD305A | 0.000 | ALPHA | -0.684 | THOLE | 2.074 |
| ATOM | C1  | CD31FA | 0.124 | ALPHA | -1.022 | THOLE | 0.462 |
| ATOM | H1  | HDA1A  | 0.070 |       |        |       |       |
| ATOM | O1  | OD31E  | 0.000 | ALPHA | -1.176 | THOLE | 1.559 |
| ATOM | HO1 | HDP1A  | 0.333 |       |        |       |       |
| ATOM | C4  | CD31FC | 0.112 | ALPHA | -1.014 | THOLE | 0.820 |
| ATOM | H4  | HDA2E  | 0.069 |       |        |       |       |

```

ATOM LP1A LPD      -0.202
ATOM LP1B LPD      -0.202
ATOM LP4A LPD      -0.152
ATOM LP4B LPD      -0.152
ATOM LPX4 LPD       0.000 !dummy for anisotropic polarizability
GROUP ! taken from ETOH
ATOM C5   CD32A   -0.086  ALPHA -1.805 THOLE 0.353
ATOM H51  HDA2A    0.080
ATOM H52  HDA2A    0.080
ATOM O5   OD31A    0.000  ALPHA -0.732 THOLE 1.027
ATOM HO5  HDP1A    0.328
ATOM LP5A LPD      -0.201
ATOM LP5B LPD      -0.201
GROUP ! taken from THF
ATOM C2   CD325B  -0.142  ALPHA -1.617  THOLE 1.103! ALPHA @ALPHA1 THOLE
@THOLE1 !ALPHA -1.617  THOLE 1.103
ATOM H21  HDA2R5   0.071
ATOM H22  HDA2R5   0.071
GROUP ! taken from glycerol
ATOM C3   CD31FB  -0.006  ALPHA -1.127 THOLE 1.340
ATOM H3    HDA1A   0.070
ATOM O3   OD31E   0.000  ALPHA -0.881 THOLE 0.328
ATOM HO3  HDP1A   0.322
ATOM LP3A LPD      -0.193
ATOM LP3B LPD      -0.193
!
BOND O4 C1  C1 H1    C1 O1    O1 HO1
BOND C1 C2  C2 H21   C2 H22   C2 C3
BOND C3 H3  C3 O3    O3 HO3   C3 C4
BOND C4 H4  C4 O4    C4 C5    C5 H51
BOND C5 H52 C5 O5    O5 HO5
BOND O1 LP1A O1 LP1B
BOND O3 LP3A O3 LP3B
BOND O4 LP4A O4 LP4B O4 LPX4
BOND O5 LP5A O5 LP5B

LONEPAIR relative LP1A O1 C1 HO1 distance 0.35 angle 110.0 dihe 91.0
LONEPAIR relative LP1B O1 C1 HO1 distance 0.35 angle 110.0 dihe 269.0
ANISOTROPY O1 C1 LP1A LP1B A11 0.8108 A22 1.2162

LONEPAIR relative LP3A O3 C3 HO3 distance 0.35 angle 110.0 dihe 91.0
LONEPAIR relative LP3B O3 C3 HO3 distance 0.35 angle 110.0 dihe 269.0
ANISOTROPY O3 C3 LP3A LP3B A11 0.8108 A22 1.2162

LONEPAIR bisector LP4A O4 C1 C4 distance 0.35 angle 110.0 dihe 90.0
LONEPAIR bisector LP4B O4 C1 C4 distance 0.35 angle 110.0 dihe 270.0
LONEPAIR bisector LPX4 O4 C1 C4 distance 0.10 angle 0.0 dihe 0.0
ANISOTROPY O4 LPX4 LP4A LP4B A11 0.8889 A22 1.2222

LONEPAIR relative LP5A O5 C5 HO5 distance 0.35 angle 110.0 dihe 91.0
LONEPAIR relative LP5B O5 C5 HO5 distance 0.35 angle 110.0 dihe 269.0
ANISOTROPY O5 C5 LP5A LP5B A11 0.8108 A22 1.2162

```

! IC table; from minimized geometry\*



GROUP ! taken from THF  
ATOM C2 CD325B -0.142 ALPHA -1.617 THOLE 1.103! ALPHA @ALPHA1 THOLE  
@THOLE1 !ALPHA -1.617 THOLE 1.103

ATOM H21 HDA2R5 0.071  
ATOM H22 HDA2R5 0.071

GROUP ! taken from glycerol

ATOM C3 CD31FB -0.006 ALPHA -1.127 THOLE 1.340  
ATOM H3 HDA1A 0.070  
ATOM O3 OD31E 0.000 ALPHA -0.881 THOLE 0.328  
ATOM HO3 HDP1A 0.322  
ATOM LP3A LPD -0.193  
ATOM LP3B LPD -0.193

!

BOND O4 C1 C1 H1 C1 O1 O1 HO1  
BOND C1 C2 C2 H21 C2 H22 C2 C3  
BOND C3 H3 C3 O3 O3 HO3 C3 C4  
BOND C4 H4 C4 O4 C4 C5 C5 H51  
BOND C5 H52 C5 O5 O5 HO5  
BOND O1 LP1A O1 LP1B  
BOND O3 LP3A O3 LP3B  
BOND O4 LP4A O4 LP4B O4 LPX4  
BOND O5 LP5A O5 LP5B

LONEPAIR relative LP1A O1 C1 HO1 distance 0.35 angle 110.0 dihe 91.0  
LONEPAIR relative LP1B O1 C1 HO1 distance 0.35 angle 110.0 dihe 269.0  
ANISOTROPY O1 C1 LP1A LP1B A11 0.8108 A22 1.2162

LONEPAIR relative LP3A O3 C3 HO3 distance 0.35 angle 110.0 dihe 91.0  
LONEPAIR relative LP3B O3 C3 HO3 distance 0.35 angle 110.0 dihe 269.0  
ANISOTROPY O3 C3 LP3A LP3B A11 0.8108 A22 1.2162

LONEPAIR bisector LP4A O4 C1 C4 distance 0.35 angle 110.0 dihe 90.0  
LONEPAIR bisector LP4B O4 C1 C4 distance 0.35 angle 110.0 dihe 270.0  
LONEPAIR bisector LPX4 O4 C1 C4 distance 0.10 angle 0.0 dihe 0.0  
ANISOTROPY O4 LPX4 LP4A LP4B A11 0.8889 A22 1.2222

LONEPAIR relative LP5A O5 C5 HO5 distance 0.35 angle 110.0 dihe 91.0  
LONEPAIR relative LP5B O5 C5 HO5 distance 0.35 angle 110.0 dihe 269.0  
ANISOTROPY O5 C5 LP5A LP5B A11 0.8108 A22 1.2162

! IC table; from minimized geometry\*

|    |    |    |     |     |        |        |         |        |        |
|----|----|----|-----|-----|--------|--------|---------|--------|--------|
| IC | C4 | O4 | C1  | C2  | 1.4309 | 108.67 | -19.01  | 106.25 | 1.5278 |
| IC | O4 | C1 | C2  | C3  | 1.4258 | 106.25 | -8.82   | 103.23 | 1.5178 |
| IC | C1 | C2 | C3  | C4  | 1.5278 | 103.23 | 31.05   | 101.83 | 1.5232 |
| IC | C3 | O4 | *C4 | C5  | 1.5232 | 101.44 | 124.05  | 113.01 | 1.5448 |
| IC | C3 | O4 | *C4 | H4  | 1.5232 | 101.44 | -115.42 | 106.74 | 1.1134 |
| IC | O4 | C4 | C5  | O5  | 1.4309 | 113.01 | -178.27 | 111.12 | 1.4304 |
| IC | C4 | C5 | O5  | HO5 | 1.5448 | 111.12 | -87.73  | 110.40 | 0.9643 |
| IC | O4 | C4 | *C5 | H51 | 2.4824 | 32.04  | 59.71   | 109.84 | 1.1020 |
| IC | O4 | C4 | *C5 | H52 | 2.4824 | 32.04  | -58.37  | 108.86 | 1.1027 |
| IC | C2 | O4 | *C1 | O1  | 1.5278 | 106.25 | -119.87 | 110.66 | 1.3905 |
| IC | O4 | C1 | O1  | HO1 | 1.4258 | 110.66 | 60.11   | 106.63 | 0.9584 |
| IC | C2 | O4 | *C1 | H1  | 1.5278 | 106.25 | 119.86  | 107.45 | 1.1137 |
| IC | C3 | C1 | *C2 | H21 | 1.5178 | 103.23 | 118.42  | 111.24 | 1.1030 |

|       |    |     |     |        |        |         |        |        |
|-------|----|-----|-----|--------|--------|---------|--------|--------|
| IC C3 | C1 | *C2 | H22 | 1.5178 | 103.23 | -122.05 | 112.95 | 1.0962 |
| IC C2 | C4 | *C3 | O3  | 1.5178 | 101.83 | -120.07 | 112.49 | 1.4116 |
| IC C4 | C3 | O3  | HO3 | 1.5232 | 112.49 | -53.93  | 107.21 | 0.9673 |
| IC C2 | C4 | *C3 | H3  | 1.5178 | 101.83 | 117.41  | 109.93 | 1.1144 |

!!!!!!!!!!!!!!!!!!!!!!!!!!!!!!!!!!!!  
! O-alkyl patches for furanose !  
!!!!!!!!!!!!!!!!!!!!!!!!!!!!!!!!!!!!

PRES FOMA 0.000 ! adding alpha O-methyl to C1 on aldopentose

dele atom HO1  
dele atom LP1A  
dele atom LP1B

GROUP

|           |        |        |       |        |       |       |
|-----------|--------|--------|-------|--------|-------|-------|
| ATOM O4   | OD305A | 0.000  | ALPHA | -0.505 | THOLE | 0.807 |
| ATOM C1   | CD31FA | 0.152  | ALPHA | -1.000 | THOLE | 0.487 |
| ATOM H1   | HDA1A  | 0.070  |       |        |       |       |
| ATOM O1   | OD30A  | 0.000  | ALPHA | -0.503 | THOLE | 0.443 |
| ATOM CM   | CD33E  | -0.053 | ALPHA | -1.038 | THOLE | 0.667 |
| ATOM HM1  | HDA3A  | 0.069  |       |        |       |       |
| ATOM HM2  | HDA3A  | 0.069  |       |        |       |       |
| ATOM HM3  | HDA3A  | 0.069  |       |        |       |       |
| ATOM C4   | CD31FC | 0.131  | ALPHA | -1.029 | THOLE | 0.909 |
| ATOM H4   | HDA2E  | 0.069  |       |        |       |       |
| ATOM LPMA | LPD    | -0.121 |       |        |       |       |
| ATOM LPMB | LPD    | -0.121 |       |        |       |       |
| ATOM LP4A | LPD    | -0.167 |       |        |       |       |
| ATOM LP4B | LPD    | -0.167 |       |        |       |       |

ATOM LPX4 LPD 0.000 !dummy for anisotropic polarizability  
ATOM LPX1 LPD 0.000 !dummy for anisotropic polarizability

BOND O1 CM  
BOND CM HM1 CM HM2 CM HM3  
BOND O1 LPMA O1 LPMB O1 LPX1

LONEPAIR bisector LPMA O1 C1 CM distance 0.35 angle 110.0 dihe 90.0  
LONEPAIR bisector LPMB O1 C1 CM distance 0.35 angle 110.0 dihe 270.0  
LONEPAIR bisector LPX1 O1 C1 CM distance 0.10 angle 0.0 dihe 0.0  
ANISOTROPY O1 LPX1 LPMA LPMB A11 0.8889 A22 1.2222

| !  | I   | J  | K   | L   | R(IK)  | T(IKJ) | PHI     | T(JKL) | R(KL)  |
|----|-----|----|-----|-----|--------|--------|---------|--------|--------|
| IC | O4  | C1 | O1  | CM  | 1.4477 | 109.89 | 66.08   | 108.74 | 1.4244 |
| IC | C1  | O1 | CM  | HM1 | 1.4355 | 108.74 | 59.11   | 111.44 | 1.0883 |
| IC | HM1 | O1 | *CM | HM2 | 1.0883 | 111.44 | 119.69  | 113.64 | 1.0586 |
| IC | HM3 | O1 | *CM | HM2 | 1.1131 | 110.64 | -122.99 | 113.64 | 1.0586 |

PRES FOMB 0.000 ! adding beta O-methyl to C1 on aldopentose

dele atom HO1  
dele atom LP1A  
dele atom LP1B

GROUP

|         |        |        |       |        |       |       |
|---------|--------|--------|-------|--------|-------|-------|
| ATOM O4 | OD305A | 0.000  | ALPHA | -0.505 | THOLE | 0.807 |
| ATOM C1 | CD31FA | 0.152  | ALPHA | -1.000 | THOLE | 0.487 |
| ATOM H1 | HDA1A  | 0.070  |       |        |       |       |
| ATOM O1 | OD30A  | 0.000  | ALPHA | -0.503 | THOLE | 0.443 |
| ATOM CM | CD33E  | -0.053 | ALPHA | -1.038 | THOLE | 0.667 |

```

ATOM HM1  HDA3A    0.069
ATOM HM2  HDA3A    0.069
ATOM HM3  HDA3A    0.069
ATOM C4   CD31FC   0.131  ALPHA -1.029 THOLE 0.909
ATOM H4   HDA2E    0.069
ATOM LPMA LPD      -0.121
ATOM LPMB LPD      -0.121
ATOM LP4A LPD      -0.167
ATOM LP4B LPD      -0.167
ATOM LPX4 LPD      0.000 !dummy for anisotropic polarizability
ATOM LPX1 LPD      0.000 !dummy for anisotropic polarizability
BOND O1 CM
BOND CM HM1  CM HM2  CM HM3
BOND O1 LPMA O1 LPMB O1 LPX1

```

```

LONEPAIR bisector LPMA O1 C1 CM distance 0.35 angle 110.0 dihe 90.0
LONEPAIR bisector LPMB O1 C1 CM distance 0.35 angle 110.0 dihe 270.0
LONEPAIR bisector LPX1 O1 C1 CM distance 0.10 angle 0.0 dihe 0.0
ANISOTROPY O1 LPX1 LPMA LPMB A11 0.8889 A22 1.2222

```

| !  | I   | J  | K   | L   | R(IK)  | T(IKJ) | PHI     | T(JKL) | R(KL)  |
|----|-----|----|-----|-----|--------|--------|---------|--------|--------|
| IC | O4  | C1 | O1  | CM  | 1.4138 | 114.30 | -66.36  | 108.55 | 1.4077 |
| IC | C1  | O1 | CM  | HM1 | 1.4353 | 108.55 | 41.11   | 109.39 | 1.0734 |
| IC | HM1 | O1 | *CM | HM2 | 1.0734 | 109.39 | 129.90  | 119.45 | 1.0441 |
| IC | HM3 | O1 | *CM | HM2 | 1.1148 | 107.24 | -121.74 | 119.45 | 1.0441 |

!furanoses, rima

end

```

read para card append
* Drude polarizable FF parameters
*

```

BONDS

| !atom type |        | Kb    | b0    |   |
|------------|--------|-------|-------|---|
| OD305A     | CD31FA | 280.0 | 1.430 | ! |
| CD31FC     | OD305A | 280.0 | 1.415 | ! |
| CD31FA     | HDA1A  | 309.0 | 1.093 | ! |
| OD31E      | CD31FA | 350.0 | 1.400 | ! |
| CD31FA     | CD31FB | 222.5 | 1.520 | ! |
| CD31FB     | HDA1A  | 309.0 | 1.093 | ! |
| CD31FB     | OD31E  | 350.0 | 1.440 | ! |
| CD31FB     | CD31FB | 222.5 | 1.520 | ! |
| CD31FB     | CD31FC | 222.5 | 1.520 | ! |
| CD31FC     | HDA2E  | 307.0 | 1.100 | ! |
| CD31FC     | CD32A  | 222.5 | 1.510 | ! |
| CD31FA     | CD325B | 222.5 | 1.520 | ! |
| CD325B     | CD31FB | 222.5 | 1.520 | ! |
| OD30A      | CD31FA | 280.0 | 1.430 | ! |

ANGLES

| !atom types | Ktheta | Theta0 | Kub | S0 |
|-------------|--------|--------|-----|----|
| !=====      |        |        |     |    |



|        |        |        |       |        |       |       |   |
|--------|--------|--------|-------|--------|-------|-------|---|
| CD31FA | OD305A | CD31FC | 95.00 | 111.00 | !     |       |   |
| OD305A | CD31FA | HDA1A  | 70.00 | 107.30 | !     |       |   |
| OD305A | CD31FA | OD31E  | 90.00 | 111.50 | !     |       |   |
| OD305A | CD31FA | CD31FB | 45.00 | 111.10 | !     |       |   |
| OD305A | CD31FC | HDA2E  | 70.00 | 107.30 | !     |       |   |
| OD305A | CD31FC | CD32A  | 75.00 | 106.50 | !     |       |   |
| OD305A | CD31FC | CD31FB | 45.00 | 111.50 | !     |       |   |
| OD31E  | CD31FA | HDA1A  | 47.00 | 110.50 | !     |       |   |
| CD31FB | CD31FA | HDA1A  | 35.00 | 111.40 | 22.53 | 2.179 | ! |
| CD31FA | CD31FB | HDA1A  | 35.00 | 111.40 | 22.53 | 2.179 | ! |
| CD31FA | OD31E  | HDP1A  | 59.00 | 108.00 | !     |       |   |
| CD31FB | OD31E  | HDP1A  | 59.00 | 108.00 | !     |       |   |
| HDA1A  | CD31FB | OD31E  | 47.00 | 110.50 | !     |       |   |
| CD31FB | CD31FB | OD31E  | 65.30 | 109.00 | !     |       |   |
| CD31FC | CD32A  | HDA2A  | 34.60 | 110.10 | 22.53 | 2.179 | ! |
| CD31FB | CD31FB | HDA1A  | 35.00 | 111.40 | 22.53 | 2.179 | ! |
| CD31FC | CD31FB | OD31E  | 65.30 | 109.00 | !     |       |   |
| CD31FC | CD31FB | HDA1A  | 35.00 | 111.40 | 22.53 | 2.179 | ! |
| CD31FC | CD31FB | CD31FB | 58.00 | 109.50 | 11.16 | 2.561 | ! |
| CD31FC | CD32A  | OD31A  | 63.00 | 111.00 | !     |       |   |
| HDA2E  | CD31FC | CD32A  | 34.50 | 110.10 | 22.53 | 2.179 | ! |
| CD31FA | CD31FB | CD31FB | 58.00 | 109.50 | 11.16 | 2.561 | ! |
| CD31FA | CD31FB | OD31E  | 65.30 | 109.00 | !     |       |   |
| CD32A  | CD31FC | CD31FB | 58.00 | 109.50 | 11.16 | 2.561 | ! |
| HDA2E  | CD31FC | CD31FB | 35.00 | 111.40 | 22.53 | 2.179 | ! |
| CD31FB | CD31FA | OD31E  | 65.30 | 109.00 | !     |       |   |
| OD305A | CD31FA | CD325B | 45.00 | 111.10 | !     |       |   |
| HDA1A  | CD31FA | CD325B | 35.00 | 111.40 | 22.53 | 2.179 | ! |
| OD31E  | CD31FA | CD325B | 65.30 | 109.00 | !     |       |   |
| CD31FA | CD325B | HDA2R5 | 35.00 | 111.40 | 22.53 | 2.179 | ! |
| CD31FB | CD325B | HDA2R5 | 35.00 | 111.40 | 22.53 | 2.179 | ! |
| CD31FA | CD325B | CD31FB | 58.00 | 109.50 | 11.16 | 2.561 | ! |
| CD31FC | CD31FB | CD325B | 58.00 | 109.50 | 11.16 | 2.561 | ! |
| CD325B | CD31FB | HDA1A  | 35.00 | 111.40 | 22.53 | 2.179 | ! |
| CD325B | CD31FB | OD31E  | 65.30 | 109.00 | !     |       |   |
| OD305A | CD31FA | OD30A  | 90.00 | 111.50 | !     |       |   |
| HDA1A  | CD31FA | OD30A  | 47.00 | 110.50 | !     |       |   |
| OD30A  | CD31FA | CD31FB | 65.30 | 109.00 | !     |       |   |
| CD31FA | OD30A  | CD33E  | 95.00 | 109.70 | !     |       |   |

DIHEDRALS

| !atom types      |        | Kchi   | n      | delta |   |      |   |
|------------------|--------|--------|--------|-------|---|------|---|
| !=====           |        |        |        |       |   |      |   |
| !                |        |        |        |       |   |      |   |
| !furanoses, rima |        |        |        |       |   |      |   |
| OD305A           | CD31FA | CD31FB | HDA1A  | 0.190 | 3 | 0.00 | ! |
| OD305A           | CD31FC | CD32A  | HDA2A  | 0.200 | 3 | 0.00 | ! |
| OD305A           | CD31FC | CD31FB | HDA1A  | 0.190 | 3 | 0.00 | ! |
| CD31FA           | OD305A | CD31FC | HDA2E  | 0.300 | 3 | 0.00 | ! |
| HDA1A            | CD31FA | OD305A | CD31FC | 0.300 | 3 | 0.00 | ! |
| CD31FA           | CD31FB | CD31FB | HDA1A  | 0.190 | 3 | 0.00 | ! |
| HDP1A            | OD31E  | CD31FA | HDA1A  | 0.060 | 1 | 0.00 | ! |
| HDP1A            | OD31E  | CD31FA | HDA1A  | 0.060 | 2 | 0.00 | ! |
| HDP1A            | OD31E  | CD31FA | HDA1A  | 0.000 | 3 | 0.00 | ! |

|                   |        |        |        |        |   |          |
|-------------------|--------|--------|--------|--------|---|----------|
| HDA1A             | CD31FA | CD31FB | HDA1A  | 0.190  | 3 | 0.00 !   |
| OD31E             | CD31FB | CD31FA | HDA1A  | 0.270  | 1 | 0.00 !   |
| OD31E             | CD31FB | CD31FA | HDA1A  | 0.050  | 2 | 0.00 !   |
| OD31E             | CD31FB | CD31FA | HDA1A  | 0.120  | 3 | 0.00 !   |
| CD31FB            | CD31FB | CD31FA | HDA1A  | 0.190  | 3 | 0.00 !   |
| OD31E             | CD31FA | CD31FB | HDA1A  | 0.270  | 1 | 0.00 !   |
| OD31E             | CD31FA | CD31FB | HDA1A  | 0.050  | 2 | 0.00 !   |
| OD31E             | CD31FA | CD31FB | HDA1A  | 0.120  | 3 | 0.00 !   |
| CD31FC            | CD31FB | CD31FB | HDA1A  | 0.190  | 3 | 0.00 !   |
| HDA2E             | CD31FC | CD32A  | HDA2A  | 0.190  | 3 | 0.00 !   |
| HDA2E             | CD31FC | CD32A  | OD31A  | 0.175  | 3 | 0.00 !   |
| HDA2E             | CD31FC | CD31FB | CD31FB | 0.190  | 3 | 0.00 !   |
| HDA2E             | CD31FC | CD31FB | HDA1A  | 0.190  | 3 | 0.00 !   |
| HDA2E             | CD31FC | CD31FB | OD31E  | 0.270  | 1 | 0.00 !   |
| HDA2E             | CD31FC | CD31FB | OD31E  | 0.050  | 2 | 0.00 !   |
| HDA2E             | CD31FC | CD31FB | OD31E  | 0.120  | 3 | 0.00 !   |
| CD31FB            | CD31FB | CD31FC | CD32A  | 0.410  | 3 | 180.00 ! |
| HDA1A             | CD31FB | CD31FC | CD32A  | 0.190  | 3 | 0.00 !   |
| CD31FB            | CD31FC | CD32A  | HDA2A  | 0.190  | 3 | 0.00 !   |
| HDA1A             | CD31FB | OD31E  | HDP1A  | 0.060  | 1 | 0.00 !   |
| HDA1A             | CD31FB | OD31E  | HDP1A  | 0.060  | 2 | 0.00 !   |
| HDA1A             | CD31FB | OD31E  | HDP1A  | 0.000  | 3 | 0.00 !   |
| HDA1A             | CD31FB | CD31FB | HDA1A  | 0.190  | 3 | 0.00 !   |
| OD31E             | CD31FB | CD31FB | HDA1A  | 0.270  | 1 | 0.00 !   |
| OD31E             | CD31FB | CD31FB | HDA1A  | 0.050  | 2 | 0.00 !   |
| OD31E             | CD31FB | CD31FB | HDA1A  | 0.120  | 3 | 0.00 !   |
| !fitdih furanoses |        |        |        |        |   |          |
| CD31FA            | CD31FB | CD31FB | CD31FC | 1.0392 | 1 | 0.00 !   |
| CD31FA            | CD31FB | CD31FB | CD31FC | 0.9303 | 2 | 0.00 !   |
| CD31FA            | CD31FB | CD31FB | CD31FC | 0.7483 | 3 | 0.00 !   |
| CD31FA            | CD31FB | CD31FB | OD31E  | 0.2742 | 1 | 0.00 !   |
| CD31FA            | CD31FB | CD31FB | OD31E  | 0.0453 | 2 | 0.00 !   |
| CD31FA            | CD31FB | CD31FB | OD31E  | 0.5903 | 3 | 180.00 ! |
| CD31FA            | CD31FB | OD31E  | HDP1A  | 0.2611 | 1 | 0.00 !   |
| CD31FA            | CD31FB | OD31E  | HDP1A  | 0.5154 | 2 | 0.00 !   |
| CD31FA            | CD31FB | OD31E  | HDP1A  | 0.1830 | 3 | 0.00 !   |
| CD31FB            | CD31FC | OD305A | CD31FA | 0.6882 | 1 | 0.00 !   |
| CD31FB            | CD31FC | OD305A | CD31FA | 0.7079 | 2 | 0.00 !   |
| CD31FB            | CD31FC | OD305A | CD31FA | 0.7433 | 3 | 0.00 !   |
| CD32A             | CD31FC | OD305A | CD31FA | 0.9269 | 1 | 180.00 ! |
| CD32A             | CD31FC | OD305A | CD31FA | 0.5245 | 2 | 0.00 !   |
| CD32A             | CD31FC | OD305A | CD31FA | 0.2728 | 3 | 0.00 !   |
| CD31FB            | CD31FA | OD31E  | HDP1A  | 0.3772 | 1 | 0.00 !   |
| CD31FB            | CD31FA | OD31E  | HDP1A  | 0.4430 | 2 | 0.00 !   |
| CD31FB            | CD31FA | OD31E  | HDP1A  | 0.1763 | 3 | 180.00 ! |
| CD31FB            | CD31FB | CD31FC | OD305A | 0.5081 | 1 | 0.00 !   |
| CD31FB            | CD31FB | CD31FC | OD305A | 0.4468 | 2 | 0.00 !   |
| CD31FB            | CD31FB | CD31FC | OD305A | 0.3245 | 3 | 0.00 !   |
| CD31FB            | CD31FB | OD31E  | HDP1A  | 0.4056 | 1 | 0.00 !   |
| CD31FB            | CD31FB | OD31E  | HDP1A  | 0.4316 | 2 | 0.00 !   |
| CD31FB            | CD31FB | OD31E  | HDP1A  | 0.2648 | 3 | 0.00 !   |
| OD31E             | CD31FA | CD31FB | CD31FB | 0.1215 | 1 | 0.00 !   |
| OD31E             | CD31FA | CD31FB | CD31FB | 0.6332 | 2 | 180.00 ! |
| OD31E             | CD31FA | CD31FB | CD31FB | 0.3012 | 3 | 180.00 ! |

|        |        |        |        |        |   |          |
|--------|--------|--------|--------|--------|---|----------|
| OD305A | CD31FA | CD31FB | CD31FB | 0.4187 | 1 | 0.00 !   |
| OD305A | CD31FA | CD31FB | CD31FB | 0.2784 | 2 | 0.00 !   |
| OD305A | CD31FA | CD31FB | CD31FB | 0.0200 | 3 | 0.00 !   |
| CD31FB | CD31FC | CD32A  | OD31A  | 0.5003 | 1 | 180.00 ! |
| CD31FB | CD31FC | CD32A  | OD31A  | 0.2096 | 2 | 0.00 !   |
| CD31FB | CD31FC | CD32A  | OD31A  | 0.0681 | 3 | 0.00 !   |
| CD31FC | CD31FB | CD31FB | OD31E  | 0.3659 | 1 | 180.00 ! |
| CD31FC | CD31FB | CD31FB | OD31E  | 0.2749 | 2 | 0.00 !   |
| CD31FC | CD31FB | CD31FB | OD31E  | 0.8934 | 3 | 0.00 !   |
| CD31FC | CD31FB | OD31E  | HDP1A  | 0.3741 | 1 | 0.00 !   |
| CD31FC | CD31FB | OD31E  | HDP1A  | 0.0242 | 2 | 0.00 !   |
| CD31FC | CD31FB | OD31E  | HDP1A  | 0.1025 | 3 | 0.00 !   |
| CD31FC | CD32A  | OD31A  | HDP1A  | 0.3581 | 1 | 0.00 !   |
| CD31FC | CD32A  | OD31A  | HDP1A  | 0.4874 | 2 | 0.00 !   |
| CD31FC | CD32A  | OD31A  | HDP1A  | 0.1880 | 3 | 0.00 !   |
| CD31FB | CD31FA | OD305A | CD31FC | 0.8201 | 1 | 0.00 !   |
| CD31FB | CD31FA | OD305A | CD31FC | 0.5947 | 2 | 0.00 !   |
| CD31FB | CD31FA | OD305A | CD31FC | 0.2261 | 3 | 0.00 !   |
| OD31E  | CD31FA | OD305A | CD31FC | 1.1409 | 1 | 180.00 ! |
| OD31E  | CD31FA | OD305A | CD31FC | 1.0488 | 2 | 0.00 !   |
| OD31E  | CD31FA | OD305A | CD31FC | 0.3135 | 3 | 0.00 !   |
| OD31E  | CD31FB | CD31FC | CD32A  | 0.1541 | 1 | 0.00 !   |
| OD31E  | CD31FB | CD31FC | CD32A  | 0.3485 | 2 | 180.00 ! |
| OD31E  | CD31FB | CD31FC | CD32A  | 0.0817 | 3 | 0.00 !   |
| OD31E  | CD31FA | CD31FB | OD31E  | 0.2182 | 1 | 180.00 ! |
| OD31E  | CD31FA | CD31FB | OD31E  | 0.1501 | 2 | 180.00 ! |
| OD31E  | CD31FA | CD31FB | OD31E  | 0.0060 | 3 | 0.00 !   |
| OD305A | CD31FA | CD31FB | OD31E  | 0.4388 | 1 | 0.00 !   |
| OD305A | CD31FA | CD31FB | OD31E  | 0.4009 | 2 | 180.00 ! |
| OD305A | CD31FA | CD31FB | OD31E  | 0.3834 | 3 | 0.00 !   |
| OD31E  | CD31FB | CD31FB | OD31E  | 0.4307 | 1 | 180.00 ! |
| OD31E  | CD31FB | CD31FB | OD31E  | 0.6208 | 2 | 180.00 ! |
| OD31E  | CD31FB | CD31FB | OD31E  | 0.4495 | 3 | 180.00 ! |
| OD31E  | CD31FB | CD31FC | OD305A | 0.7740 | 1 | 180.00 ! |
| OD31E  | CD31FB | CD31FC | OD305A | 0.0201 | 2 | 0.00 !   |
| OD31E  | CD31FB | CD31FC | OD305A | 0.5125 | 3 | 0.00 !   |
| OD305A | CD31FA | OD31E  | HDP1A  | 0.7166 | 1 | 0.00 !   |
| OD305A | CD31FA | OD31E  | HDP1A  | 1.0359 | 2 | 0.00 !   |
| OD305A | CD31FA | OD31E  | HDP1A  | 0.6708 | 3 | 0.00 !   |
| OD305A | CD31FC | CD32A  | OD31A  | 0.9708 | 1 | 180.00 ! |
| OD305A | CD31FC | CD32A  | OD31A  | 0.7860 | 2 | 0.00 !   |
| OD305A | CD31FC | CD32A  | OD31A  | 0.0222 | 3 | 180.00 ! |
| OD305A | CD31FA | CD325B | HDA2R5 | 0.190  | 3 | 0.00 !   |
| CD31FA | CD325B | CD31FB | CD31FC | 1.0392 | 1 | 0.00 !   |
| CD31FA | CD325B | CD31FB | CD31FC | 0.9303 | 2 | 0.00 !   |
| CD31FA | CD325B | CD31FB | CD31FC | 0.7483 | 3 | 0.00 !   |
| CD31FA | CD325B | CD31FB | HDA1A  | 0.190  | 3 | 0.00 !   |
| HDA1A  | CD31FA | CD325B | HDA2R5 | 0.190  | 3 | 0.00 !   |
| HDA1A  | CD31FA | CD325B | CD31FB | 0.190  | 3 | 0.00 !   |
| OD31E  | CD31FA | CD325B | HDA2R5 | 0.270  | 1 | 0.00 !   |
| OD31E  | CD31FA | CD325B | HDA2R5 | 0.050  | 2 | 0.00 !   |
| OD31E  | CD31FA | CD325B | HDA2R5 | 0.120  | 3 | 0.00 !   |
| CD31FC | CD31FB | CD325B | HDA2R5 | 0.190  | 3 | 0.00 !   |
| HDA2E  | CD31FC | CD31FB | CD325B | 0.190  | 3 | 0.00 !   |

|        |        |        |        |        |   |          |
|--------|--------|--------|--------|--------|---|----------|
| CD32A  | CD31FC | CD31FB | CD325B | 0.410  | 3 | 180.00 ! |
| HDA2R5 | CD325B | CD31FB | HDA1A  | 0.190  | 3 | 0.00 !   |
| HDA2R5 | CD325B | CD31FB | OD31E  | 0.270  | 1 | 0.00 !   |
| HDA2R5 | CD325B | CD31FB | OD31E  | 0.050  | 2 | 0.00 !   |
| HDA2R5 | CD325B | CD31FB | OD31E  | 0.120  | 3 | 0.00 !   |
| OD31E  | CD31FB | CD325B | CD31FA | 1.6826 | 1 | 0.00 !   |
| OD31E  | CD31FB | CD325B | CD31FA | 0.3708 | 2 | 180.00 ! |
| OD31E  | CD31FB | CD325B | CD31FA | 1.0478 | 3 | 180.00 ! |
| CD325B | CD31FA | OD31E  | HDP1A  | 0.5210 | 1 | 0.00 !   |
| CD325B | CD31FA | OD31E  | HDP1A  | 0.2497 | 2 | 0.00 !   |
| CD325B | CD31FA | OD31E  | HDP1A  | 0.2382 | 3 | 0.00 !   |
| CD325B | CD31FB | CD31FC | OD305A | 0.4277 | 1 | 180.00 ! |
| CD325B | CD31FB | CD31FC | OD305A | 0.3937 | 2 | 180.00 ! |
| CD325B | CD31FB | CD31FC | OD305A | 0.3030 | 3 | 180.00 ! |
| CD325B | CD31FB | OD31E  | HDP1A  | 0.9384 | 1 | 0.00 !   |
| CD325B | CD31FB | OD31E  | HDP1A  | 0.0104 | 2 | 0.00 !   |
| CD325B | CD31FB | OD31E  | HDP1A  | 0.2568 | 3 | 0.00 !   |
| OD31E  | CD31FA | CD325B | CD31FB | 0.2311 | 1 | 0.00 !   |
| OD31E  | CD31FA | CD325B | CD31FB | 0.3468 | 2 | 180.00 ! |
| OD31E  | CD31FA | CD325B | CD31FB | 0.0532 | 3 | 0.00 !   |
| OD305A | CD31FA | CD325B | CD31FB | 0.2237 | 1 | 0.00 !   |
| OD305A | CD31FA | CD325B | CD31FB | 0.1834 | 2 | 0.00 !   |
| OD305A | CD31FA | CD325B | CD31FB | 0.1093 | 3 | 0.00 !   |
| CD325B | CD31FA | OD305A | CD31FC | 0.3531 | 1 | 0.00 !   |
| CD325B | CD31FA | OD305A | CD31FC | 0.1220 | 2 | 0.00 !   |
| CD325B | CD31FA | OD305A | CD31FC | 0.2640 | 3 | 180.00 ! |
| CD31FA | OD30A  | CD33E  | HDA3A  | 0.000  | 3 | 0.00 !   |
| HDA1A  | CD31FA | OD30A  | CD33E  | 0.000  | 3 | 0.00 !   |
| OD30A  | CD31FA | CD31FB | HDA1A  | 0.000  | 3 | 0.00 !   |
| OD30A  | CD31FA | CD31FB | CD31FB | 1.3664 | 1 | 0.00 !   |
| OD30A  | CD31FA | CD31FB | CD31FB | 1.0474 | 2 | 0.00 !   |
| OD30A  | CD31FA | CD31FB | CD31FB | 1.8077 | 3 | 180.00 ! |
| CD31FB | CD31FA | OD30A  | CD33E  | 1.3198 | 1 | 180.00 ! |
| CD31FB | CD31FA | OD30A  | CD33E  | 0.5302 | 2 | 180.00 ! |
| CD31FB | CD31FA | OD30A  | CD33E  | 0.0701 | 3 | 0.00 !   |
| OD30A  | CD31FA | CD31FB | OD31E  | 0.2039 | 1 | 180.00 ! |
| OD30A  | CD31FA | CD31FB | OD31E  | 1.6691 | 2 | 180.00 ! |
| OD30A  | CD31FA | CD31FB | OD31E  | 1.6110 | 3 | 0.00 !   |
| OD30A  | CD31FA | OD305A | CD31FC | 0.8447 | 1 | 0.00 !   |
| OD30A  | CD31FA | OD305A | CD31FC | 1.8332 | 2 | 0.00 !   |
| OD30A  | CD31FA | OD305A | CD31FC | 0.6738 | 3 | 0.00 !   |
| OD305A | CD31FA | OD30A  | CD33E  | 0.4818 | 1 | 180.00 ! |
| OD305A | CD31FA | OD30A  | CD33E  | 1.2301 | 2 | 0.00 !   |
| OD305A | CD31FA | OD30A  | CD33E  | 1.0062 | 3 | 0.00 !   |

NBFIX

!

|       |     |          |           |
|-------|-----|----------|-----------|
| OD31A | ODW | -0.17790 | 3.52190 ! |
| OD31E | ODW | -0.17990 | 3.48690 ! |

END
